# COVID-19 and Indian population: a comparative genetic analysis

1 Saurabh Patil<sup>1</sup>, Sandhya Kiran Pemmasani<sup>1\*</sup>, Neelima Chitturi<sup>1</sup>, Ishita Bhatnagar<sup>1</sup>, Anuradha  
2 Acharya<sup>1</sup>, Lingareddy Venkata Subash<sup>1</sup>

3 <sup>1</sup> Research and Development Division, Mapmygenome India Limited, Hyderabad, India

4

5 **\* Correspondence:**

6 Dr. Sandhya Kiran Pemmasani

7 drsandhyakiran@mapmygenome.in

8

9 **Keywords:** COVID-19, COVID-19 susceptibility, COVID-19 severity, comparative genetics,  
10 corona virus, SARS-CoV2

11

12

13

14

15

16

17

18

19

20

21

22

23

24

25

26

27 **ABSTRACT**

28

29 **Background**

30 Major risk factors of COVID-19 include older age, male gender, and comorbidities. In addition, host  
31 genetic makeup is also known to play a major role in COVID-19 susceptibility and severity. To  
32 assess the genetic predisposition of the Indian population to COVID-19, a comparative analysis of  
33 the frequencies of polymorphisms directly or potentially associated with COVID-19 susceptibility,  
34 severity, immune response, and fatal outcomes was done between the Indian population and other  
35 major populations (European, African, East Asian, South Asian, and American).

36

37 **Materials and methods**

38 Polymorphisms directly or potentially associated with COVID-19 susceptibility, severity, immune  
39 response, and mortality were mined from genetic association studies, comparative genetic studies,  
40 expression quantitative trait loci studies among others. Genotype data of these polymorphisms were  
41 either sourced from the GenomegaDB<sup>TM</sup> database of Mapmygenome India Ltd. (sample size = 3054;  
42 Indian origin) or were imputed. Polymorphisms with minor allele frequency  $\geq 0.05$  and that are in  
43 Hardy-Weinberg equilibrium in the Indian population were considered for allele frequency  
44 comparison between the Indian population and 1000 Genome population groups.

45

46 **Results**

47 Allele frequencies of 421 polymorphisms were found to be significantly different in the Indian  
48 population compared to European, African, East Asian, South Asian, and American populations. 128  
49 polymorphisms were shortlisted based on linkage disequilibrium and were analyzed in detail. Apart  
50 from well-studied genes, like ACE2, TMPRSS2, ADAM17, and FURIN, variants from AHSG,  
51 IFITM3, PTPN2, CD209, CCL5, HEATR9, SELENBP9, AGO1, HLA-G, MX1, ICAM3, MUC5B,  
52 CRP, C1GALT1, and other genes were also found to be significantly different in Indian population.  
53 These variants might be implicated in COVID-19 susceptibility and progression.

54

55 **Conclusion**

56 Our comparative study unraveled multiple genetic variants whose allele frequencies were  
57 significantly different in the Indian population and might have a potential role in COVID-19  
58 susceptibility, its severity, and fatal outcomes. This study can be very useful for selecting candidate  
59 genes/variants for future COVID-19 related genetic association studies.

60

61

62

63

64

## 65 1 INTRODUCTION

66 Coronavirus disease - 2019 (COVID-19), caused by severe acute respiratory syndrome coronavirus 2  
67 (SARS-CoV2), has strained the healthcare system and economy of a majority of nations and has  
68 crippled the human population [1, 2, 3]. COVID-19 is characterized by a range of clinical features  
69 which are categorized as most common, less common, and rare (severe). The most common  
70 symptoms are fever, dry cough, and fatigue, while less common symptoms are pneumonia without  
71 noticeable hypoxemia, sputum production, sore throat, headache, chest pain, and diarrhea [4, 5].  
72 Acute respiratory distress syndrome, sepsis, acute cardiac injury, heart failure, acute kidney injury,  
73 hypoxic encephalopathy are more common in severe cases [4, 5, 6]. Severe patients show elevated  
74 levels of pro-inflammatory cytokines, indicating the presence of cytokine storm [4]. Self-reported  
75 loss of smell and taste was also observed in some cases [7].

76 Major risk factors for COVID-19 severity are older age, male gender, and comorbidities. A higher  
77 case fatality rate (CFR) has been observed in older adults as compared to the younger population [8,  
78 9, 10, 11, 12]. Relatively fewer female deaths are consistently observed as compared to males [10,  
79 11, 12]. COVID-19 patients with comorbidities like hypertension, obesity, diabetes, and others are  
80 more likely to develop severe complications than ones without any underlying diseases [13, 14, 15,  
81 16, 17, 18]. ABO blood groups also seem to be contributing to COVID-19 related risk. While blood  
82 group A is associated with an increased risk of severe COVID-19 outcomes, blood group O seems to  
83 be protective [19, 20, 21].

84 In addition to the above risk factors, host genetics can modulate susceptibility and severity of the  
85 disease by regulating viral entry and host immune response [22, 23]. For example, rs12329760  
86 (p.Val197Met) affects the stability of TMPRSS2 protein, which is implicated in SARS-CoV2 viral  
87 entry into host cells. This polymorphism was found to be less frequent in severe COVID-19 cases as  
88 compared to others, suggesting its protective role against severe outcomes of COVID-19 [24]. The C  
89 allele of rs12252 in the IFITM3 gene that is known for inhibiting influenza virus entry into host cells  
90 was found to be a genetic risk factor for COVID-19 hospitalization and severe outcomes [25, 26].  
91 3p21.31 gene cluster confers genetic susceptibility to COVID-19 with respiratory failure in Italian  
92 and Spanish populations [27]. Genetic variants present in immune-related genes like HLA [24, 28,  
93 29, 30], IL-6 [24], TNF-alpha [31], C5 [32, 33] are associated with COVID-19 severity.

94 While the majority of these studies were done on European and East Asian populations, limited  
95 studies were done on the Indian population [34, 35, 36]. Considering the significant role of host  
96 genetics in COVID-19 susceptibility and severity in the Indian population, we analyzed the  
97 frequencies of the polymorphisms that are directly or indirectly implicated in COVID-19. We have  
98 also made a comparison between Indian and other populations to understand allele frequency  
99 distribution globally.

100

## 101 2 MATERIALS AND METHODS

### 102 2.1 Literature mining and polymorphism selection:

103 Research articles related to COVID-19 genetic associations were searched in Pubmed using  
104 keywords such as 'COVID', 'COVID-19', 'Corona virus', 'GWAS', 'genetic susceptibility',  
105 'polymorphism', 'severity', 'susceptibility' among other relevant terms. A total of 1418 research

106 articles were found, which were thoroughly screened and 99 relevant articles were selected. A total of  
107 1974 polymorphisms were shortlisted from the selected articles.

## 108 **2.2 Genotype data for Indian population:**

109 The GenomeDB™ database of Mapmygenome India Ltd. [153] was accessed to obtain genotype  
110 data for the present study. It is a human polymorphism genotype database developed and owned by  
111 Mapmygenome. It contains genotype data of more than 20000 individuals of various ethnicities.  
112 Genotype data of 3035 individuals with confirmed Indian origin were considered in this study. For  
113 polymorphisms not present in the database, genotypes were imputed with IMPUTE2 using 1000  
114 Genomes Phase3 data as reference [37, 38]. Filtration was performed with an imputation certainty  
115 score (Info metric) set at 0.3.

## 116 **2.3 Genotype data for other populations:**

117 Allelic and genotypic frequency data of selected polymorphisms for African (AFR), East Asian  
118 (EAS), European (EUR), South Asian (SAS), and American (AMR) populations were taken from  
119 1000 Genomes Phase 3 data [38].

## 120 **2.4 Statistical analysis:**

121 Polymorphisms having minor allele frequency (MAF) greater than 0.05 in the Indian population  
122 (study population) and are in Hardy-Weinberg equilibrium (HWE) ( $p > 0.001$ ) in the Indian  
123 population were considered. Pearson's chi-square test was conducted to compare allele frequencies  
124 between the Indian population and other populations (AFR, AMR, EUR, EAS, SAS). False discovery  
125 rate (FDR) was applied to correct for multiple comparisons. These statistical tests were done with the  
126 R packages HardyWeinberg and stats [39]. LDLink tool [40] was used to calculate linkage  
127 disequilibrium (LD) among the polymorphisms.

## 128 **2.5 eQTL data:**

129 To analyze the effect of polymorphisms on gene expressions, expression quantitative trait loci  
130 (eQTL) data from publicly available GTEx Project portal was used [41]

131

## 132 **3 RESULTS**

133 Out of 1974 shortlisted polymorphisms, 936 polymorphisms had genotype information, either from  
134 GenomeDB™ or from imputation. Among them, 670 polymorphisms that had  $MAF \geq 0.05$  in the  
135 Indian population were considered for further analysis. Followed by this, 589 polymorphisms that  
136 were in HWE ( $p > 0.001$ ) were selected. Their allele frequencies in the Indian population were  
137 compared with those in other populations using Pearson's chi-square test of significance  
138 (Supplementary File 1, Supplementary Table 1). 421 polymorphisms had significant differences  
139 (FDR  $\leq 0.01$ ) in at least three populations with respect to the Indian population (Supplementary File  
140 1, Supplementary Table 2). To rule out redundancy, LD blocks were obtained, and finally, 128  
141 representative polymorphisms were considered to discuss in detail (Supplementary File 2).

142 Polymorphisms were categorized based on their effect on susceptibility to COVID-19, immune  
143 response to SARS-CoV2 infection, COVID-19 severity, mortality related to COVID-19, and  
144 comorbidities. Fifty polymorphisms directly or indirectly associated with COVID-19 susceptibility

145 (Table 1), eighteen polymorphisms implicated in the immune response to SARS-CoV2 infection  
 146 (Table 2), fifty-eight polymorphisms directly or indirectly associated with COVID-19 severity (Table  
 147 3), nine polymorphisms associated with COVID-19 related mortality/fatal outcomes (Table 4), and  
 148 twelve polymorphisms associated with comorbidities of COVID-19 (Table 5) were analyzed.

149

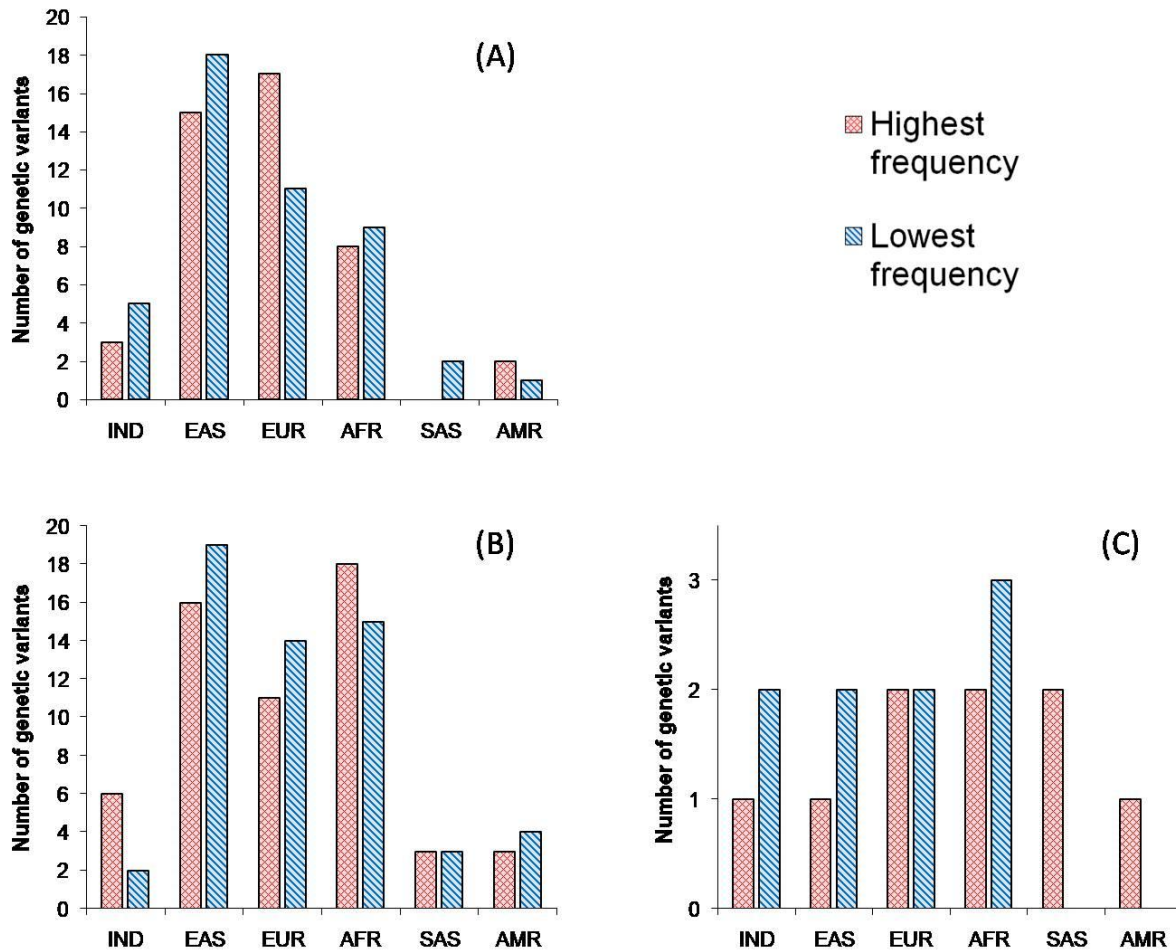

150

151 **Figure 1 Comparison of populations based on the number of variants with highest / lowest risk**  
 152 **allele frequency related to (A) Susceptibility to COVID-19, (B) COVID-19 severity, and (C)**  
 153 **COVID-19 related mortality or fatal outcomes. IND – India, EUR – Europe, AMR**

154

155 Comparing the risk allele frequencies of a variant between multiple populations can help gain insight  
 156 into relative genetic predisposition to the associated condition at the population level [42, 43]. In the  
 157 absence of case-control studies, determining the number of risk variants for different populations  
 158 might help understand the cumulative genetic effect, hence simplifying the comparison. Here, we  
 159 applied this approach to ‘COVID-19 susceptibility’, ‘COVID-19 severity’ and ‘COVID-19 related  
 160 mortality’ categories. Risk conferring variants were assigned to the populations where their  
 161 frequencies were either highest or lowest. For each population, the number of variants with the  
 162 highest risk allele frequency and lowest risk allele frequency was counted (Supplementary File 1,  
 163 Supplementary Table 3). In the ‘COVID-19 susceptibility’ category, the number of variants with the

164 highest risk allele frequency was less than the variants with the lowest risk allele frequency in the  
165 IND population. A similar trend was observed in EAS and AFR populations. However, an opposite  
166 trend was observed in EUR and AMR populations (Fig. 1A). In IND and AFR populations, COVID-  
167 19 severity-related variants with the highest risk allele frequencies were more than the lowest  
168 frequency variants, while in EAS, EUR, and AMR populations this was found to be opposite (Fig.  
169 1B). The number of variants associated with COVID-19 related mortality and having the highest risk  
170 allele frequency was less than the variants with the lowest risk allele frequency in IND, EAS, and  
171 AFR populations, while in SAS and AMR only the highest frequency variants were observed (Fig.  
172 1C).

173

## 174 **4 DISCUSSION**

### 175 **4.1 COVID-19 susceptibility**

176 SARS-CoV-2 gains entry into human cells by binding its spike protein to ACE2 receptors. ACE2, a  
177 part of the renin-angiotensin-aldosterone system (RAAS), is crucial in regulating blood pressure and  
178 maintaining electrolyte balance in the body, physiology of the heart, kidneys, and lungs [44, 45].  
179 Genetic variations in ACE2 are known to be associated with its increased expression levels in  
180 COVID-19 patients. These variants affect ACE2 transcription/translation and also alter binding  
181 affinity to SARS-CoV2 spike protein, thereby affecting the susceptibility to SARS-CoV-2 infection  
182 [46, 47]. Six ACE2 polymorphisms (rs2285666 [A], rs4240157 [T], rs4646188 [G], rs2158083 [T],  
183 rs1978124 [C] and rs233574 [T]), which are known to be associated with increased ACE2  
184 expression, were found to have allele frequencies significantly different in Indian population as  
185 compared to others [48, 49, 41, 50, 51, 52]. Their effect allele frequencies in Indian population are  
186 0.459, 0.69, 0.062, 0.76, 0.724 and 0.176, respectively (Table 1). For four of these variants, effect  
187 allele frequencies in EAS are highest suggesting that the EAS population might be predisposed to an  
188 increased susceptibility to COVID-19. In addition, the frequencies of rs1996225 [T] and rs4060 [A]  
189 of CA5BP1 gene and rs1893217 [G] of PTPN2 gene associated with increased expression of ACE2  
190 are also highest in EAS. IND population has intermediate frequencies for most of these variants  
191 indicating moderate susceptibility, while EUR has the lowest frequencies indicating reduced  
192 susceptibility.

193 ACE (angiotensin-converting enzyme) is a vital part of the vascular system. It negatively regulates  
194 ACE2 and causes vasoconstriction. Alu Insertion in the ACE coding region inhibits ACE expression,  
195 while deletion promotes ACE expression. Increased ACE2 expression is observed when homozygous  
196 Alu insertion is present in the ACE gene and vice-versa. rs4343 is in high LD with this Alu element  
197 and thus used as its tag SNP [53]. The A and G alleles of rs4343 correspond to Alu insertion and  
198 deletion, respectively [54]. Thus A allele signifies reduced ACE expression and consequently  
199 increased ACE2 expression, potentially leading to increased SARS-CoV-2 susceptibility. In Indians,  
200 the frequency of the A allele (0.604) is significantly higher than Europeans (0.435) but lesser than  
201 other populations (Table 1).

202 On infection with SARS-CoV-2, the ADAM17 shedding is activated, leading to the release of ACE2  
203 from the cell membrane into serum – thus inhibiting the virus infection. But, this effect would be  
204 compromised, if the infection rate is high [55, 56, 57, 58]. Thus ADAM17 mediated ACE2 levels  
205 may modulate COVID-19 susceptibility. ADAM17 releases the precursor TNF- $\alpha$  from the membrane  
206 to its active form – which is a crucial player in triggering an inflammatory response, leading to  
207 cytokine storm and is associated with severe lung damage in COVID-19 patients [59,60]. Thus,

208 ADAM17 might be playing role in ACE2 mediated COVID-19 susceptibility and TNF- $\alpha$  mediated  
209 COVID-19 severity. rs55790676 [G] and rs1524668 [C] associated with decreased ADAM17  
210 expression have high frequencies in IND population (0.925 and 0.403, respectively), lesser only than  
211 EAS, indicating increased susceptibility of COVID-19 in IND population.

212

213 FURIN is an endoprotease that is implicated in cleaving the SARS-CoV2 spike protein at the S1/S2  
214 site and this cleavage is crucial for viral entry into pulmonary cells [61]. Increased FURIN expression  
215 affects monocyte adhesion and transendothelial migration [62] that can lead to tissue damage which  
216 is seen in severe COVID-19 patients [63]. In this study, three genetic variants that affect FURIN  
217 expression were identified whose allele frequencies are significantly different in the IND population.  
218 rs4702 [A] and rs4932178 [T], present in FURIN coding region, are associated with increased  
219 FURIN expression [64, 41]. It was also found that rs4702 [A] is associated with increased SARS-  
220 CoV2 infection [65]. The frequency of rs4702 [A] in IND (0.499) is one of the lowest suggesting  
221 relatively lesser COVID-19 susceptibility in the IND population. The frequency of rs4932178 [T] in  
222 the IND population (0.276) is intermediate as compared to others, indicating moderate COVID-19  
223 susceptibility in IND. rs17514846 [A] is associated with the increased FURIN expression in vascular  
224 endothelial cells, where it affects monocyte adhesion and transendothelial migration [62].  
225 Recruitment of monocytes and their transendothelial migration can lead to tissue damage which is  
226 seen in severe COVID-19 patients [63, 66]. The frequency of rs17514846 [A] in IND (0.371) is  
227 significantly higher than EAS and AMR populations and lesser than EUR (Table 3).

228 IFITM-family proteins are major players in antiviral responses [67]. Severe inflammation and  
229 enhanced activation of natural killer cells are observed in influenza-infected IFITM3 deficient mice  
230 [68]. IFITM3 is up-regulated in SARS-CoV2 infected lung epithelial cells of COVID-19 patients  
231 [69], and IFITM3 seems to restrict SARS-CoV2 infection by modulating the cell membrane  
232 properties [70]. This indicates that IFITM3 might be modulating susceptibility to SARS-CoV2  
233 infection. rs11246066 [A] allele is associated with increased IFITM3 expression in whole blood and  
234 it is also an eQTL of other IFITM family genes in multiple tissues [71]. rs11246066 [A] allele  
235 frequency in the Indian population (0.189) is significantly greater only than the African population.  
236 rs9666637 [T] and rs7931303 [G] are associated with increased IFITM2 expression. rs9666637 [T]  
237 allele frequency in the Indian population (0.912) is highest among all populations, while rs7931303  
238 [G] allele frequency in the Indian population (0.398) is higher only than AFR. Considering the  
239 significance of the IFITM family, Indian population might be less susceptible to COVID-19 due to  
240 rs9666637 [T].

241 CTSL gene is involved in many biological processes such as antigen processing and presentation,  
242 proteolysis, macrophage apoptotic process, and immune response. It is associated with many diseases  
243 such as cancer, diabetes, kidney failure, and viral infections [72]. It regulates viral entry into host  
244 cells and is up-regulated during COVID-19 infection suggesting its potential role in COVID-19  
245 susceptibility and severity [72, 73]. rs3128509 [G] is associated with decreased CTSL expression in  
246 various tissues [41] and its frequency is significantly lesser in Indians (0.809) compared to African  
247 and East Asian populations but greater than European and American populations. This suggests that  
248 the Indian population might be more susceptible to COVID-19 than European and American  
249 populations but lesser than African and East populations.

250 Progesterone acts as a potent immunomodulator in regulating innate and adaptive immune responses  
251 and vascular system functions. Progesterone receptors (PGRs) are intracellular receptors that on

252 binding to progesterone or its derivative regulate target gene expression. An Alu insertion in intron 7  
253 of the PGR gene reduces transcript stability, consequently affecting PGR protein structure and  
254 function [74]. As a result of this insertion, PGR modulated differential expression of ACE2 may  
255 potentially affect SARS-CoV2 infection susceptibility. This Alu insertion is in complete LD with  
256 rs1042838. A and G alleles of rs1042838 correspond to Alu insertion and deletion, respectively [53].  
257 The frequency of rs1042838 [A] in IND (0.078) is significantly lesser than AMR (0.137) and EUR  
258 (0.179) populations while greater than AFR (0.006) and EAS (0.01) populations.

259 TMPRSS2 is a serine protease that plays an important role in SARS-COV2 entry into the host cell.  
260 The viral spike (S) protein on binding to ACE2 on the host cell is cleaved at its S1/S2 position by  
261 TMPRSS2 thus facilitating viral entry into the host cell [75]. Increased SARS-CoV2 infection  
262 correlates with increased TMPRSS2 expression [76]. Eleven polymorphisms (rs35477708 [GA],  
263 rs468259 [C], rs363981 [T], rs1638369 [T], rs469288 [G], rs468699 [C], rs462698 [A], rs8134378  
264 [G], rs467375 [A], rs4818239 [C], rs35899679 [A]) whose allele frequencies are significantly in  
265 Indian population are associated with increased TMPRSS2 expression [77, 64, 47, 41]. Except for  
266 rs8134378 [G], frequencies of remaining variants are highest in EUR and lowest in EAS, suggesting  
267 EUR might be at increased susceptibility of COVID-19 while EAS at lowest. Their frequencies in  
268 IND are intermediate thus potentially conferring moderate susceptibility in the IND population.

269 Zinc deficiency is associated with increased COVID-19 susceptibility in the Asian population [78].  
270 Among the genetic variants associated with decreased zinc levels (rs2120019 [C], rs1532423 [G],  
271 rs4826508 [C]) and thereby increased susceptibility to COVID-19, rs1532423 [G] from CA1 gene  
272 and rs4826508 [C] from the NBDY gene have the lowest frequencies in IND (0.494 and 0.273,  
273 respectively), which might be conferring reduced susceptibility to COVID-19 in Indian population.  
274 However, rs2120019 [C] from the PPCDC gene might be having an opposite effect as its frequency  
275 in IND (0.62) is highest.

276

## 277 **4.2 Immune response to SARS-CoV2 infection**

278 IFIH1 gene encodes a protein that recognizes the viral RNA and initiates immune and  
279 proinflammatory responses. rs1990760 [T], which is present in the IFIH1 coding region, is associated  
280 with autoimmune disorders and protects against viral infection [79]. T allele frequency in Indians is  
281 0.516, second only to Europeans (Table 2). Thus, this might be conferring increased protection to the  
282 Indian population against viral infections, including SARS-CoV2.

283 The chemokines CCL5, CCL4, and CCL3 play an important role in inflammation where they recruit  
284 immune cells [80, 81]. They are expressed during respiratory viral infections, and their expression  
285 levels are associated with disease severity [82, 83, 84]. In severely affected COVID-19 patients, their  
286 expression levels are significantly high, leading to liver toxicity and kidney failure, which are the  
287 most common complications associated with COVID-19 infection [82, 83, 84, 85]. rs2526327 [A] in  
288 RDM1 gene, rs1994182 [G] in MMP28 gene, rs3826404 [G] in MMP28 gene, rs2107538 [T] and  
289 rs3817655 [T] in CCL5 genes are associated with decreased CCL5 expression in whole blood [71]  
290 while rs4239252 [A] in TAF15 gene is associated with increased expression of CCL5 in whole blood  
291 [71]. All of these alleles are minor alleles in the Indian population. rs3817655, which lies in the  
292 CCL5 coding gene, is also associated with SARS-COV susceptibility [42]. The frequency of  
293 rs3817655 [T] allele in the Indian population (0.127) is least as compared to other populations.

294



### 295 4.3 COVID-19 severity

296 IGFBP2 is involved in the regulation of insulin-like growth factor receptor signaling pathways, and  
297 its expression level is used as a marker for many cancers. The intronic variant rs2270360 [A] in the  
298 IGFBP2 gene was found to be associated with increased COVID-19 severity [86]. The risk allele [A]  
299 frequency in the Indian population is 0.927 which is significantly higher than other populations,  
300 indicating the predisposition of the Indian population to the severity of the disease.

301 Low calcium levels in the serum are associated with COVID-19 severity, and maintaining proper  
302 calcium is a prerequisite to managing COVID-19 in the initial infection stage. RYR3 is a part of the  
303 calcium channel complex and releases calcium for intracellular activities [87]. rs2229117 [G] in the  
304 RYR3 gene is shown to be associated with increased COVID-19 severity [86]. G allele frequency in  
305 the Indian population (0.913) is higher than American and European populations but lesser than  
306 African and East Asian populations (Table 3). Thus this variant might be conferring a moderate risk  
307 of COVID-19 severity in the Indian population.

308 CCL2 and CCR1 play major roles in immune and inflammatory responses. CCL2 is a chemo-  
309 attractant cytokine that modulates the recruitment of monocytes, T cells, B cells, natural killer cells,  
310 macrophages, and dendritic cells [88]. Increased CCL2 levels are observed in severe COVID-19  
311 patients as compared to less severe COVID-19 patients [89]. CCR1 is a chemokine receptor that is  
312 strongly expressed in monocytes and macrophages and promotes their infiltration into the lungs in  
313 severe COVID-19 cases [90]. rs1024611 [G] and rs1015164 [G] alleles are associated with increased  
314 CCL2 expression [91] and increased CCR1 expression in whole blood [63], respectively. rs1024611  
315 [G] frequency in Indians (0.316) is significantly greater than only the African population, while  
316 rs1015164 [G] frequency in Indians (0.753) is significantly greater than only the European  
317 population (Table 3).

318 MX1 is known to be implicated in the generation of protective immune responses against influenza  
319 infection [92]. Increased MX1 expression in the nasopharynx of COVID-19 patients is observed to  
320 be proportional to SARS-CoV2 viral load. However, its expression seems to reduce with increased  
321 age, suggesting inadequate antiviral immune response in older adults causing severe COVID-19 [92].  
322 These results suggest that increased expression of MX1 might be restricting the COVID-19 severity.  
323 Six polymorphisms (rs35477708 [G], rs468259 [G], rs363981 [G], rs1638369 [G], rs469288 [A],  
324 rs468699 [T], rs462698 [G]) associated with decreased MX1 expression [41, 47] might be increasing  
325 risk of COVID-19 severity. Effect allele frequencies of each of these variants are highest in EAS and  
326 lowest in the EUR population. This indicates that the EAS population might be vulnerable to  
327 increased risk of COVID-19 severity, while EUR and IND populations might be at reduced and  
328 moderate risk, respectively.

329 TNF encodes a proinflammatory cytokine secreted by macrophages is a major player contributing to  
330 the development of cytokine storms. rs1800630 [A] in the TNF gene is associated with an increased  
331 risk of developing acute respiratory distress syndrome (ARDS) [93]. The frequency of risk allele [A]  
332 in the Indian population (0.283) is highest as compared to other populations, suggesting that the  
333 allele might be conferring increased risk of COVID-19 severity to the Indian population.

334 AHSG levels are critical for regulating macrophage deactivation. Decreased AHSG leads to impaired  
335 macrophage deactivation thus causing excess pro-inflammatory cytokine release in SARS-COV  
336 infection. rs2248690 [T] is associated with increased AHSG levels and decreased SARS-COV  
337 infection severity [94]. T allele frequency in the Indian population is 0.17 which is the least as

338 compared to other populations, indicating that the Indian population might be at an increased risk of  
339 COVID-19 severity.

340 rs10735079 in OAS gene cluster (OAS1, OAS2, OAS3) is associated with antiviral mechanisms by  
341 producing 2',5'-oligoadenylate (2-5A), which is a mediator in the antiviral process. This mediator  
342 activates RNaseL which degrades double-stranded RNA of corona virus [95]. rs10735079 [A] allele  
343 is associated with an increased risk of severe COVID-19. rs10735079 [A] allele corresponds to lower  
344 OAS1 activity and higher odds of severe COVID-19 [95]. A allele frequency in the Indian population  
345 (0.698) is lower than African, American, and East Asian populations but greater than Europeans,  
346 suggesting that the Indian population might be at a reduced risk of COVID-19 severity.

347 Decreased levels of E-selectin and IL-3Ra proteins and increased levels of B3GN2 and C1GLC  
348 proteins are associated with increased COVID-19 severity [96]. rs2519093 [T] is associated with  
349 decreased E-selectin and IL-3Ra protein levels and increased B3GN2 and C1GLC protein levels.  
350 Thus, rs2519093 [T] might be increasing COVID-19 severity through modulating these protein  
351 levels. T allele frequency in the Indian population (0.128) (Table 3), is greater than only the African  
352 population, suggesting that Indian population might be at a reduced risk of COVID-19 severity.

353 Vitamin D deficiency is associated with COVID-19 positivity and severity [97, 98]. GC gene  
354 encodes a protein that binds to vitamin D and transports it to targeted tissues. rs1155563 [C] allele,  
355 that is present in the GC gene, is associated with decreased serum vitamin-D levels [99], and its  
356 frequency in the Indian population (0.29) is greater than that of African, American, and European  
357 populations (Table 3). This suggests that rs1155563 [C] might be increasing COVID-19  
358 susceptibility and severity in the Indian population through reduced vitamin-D levels.

359

#### 360 **4.4 COVID-19 related mortality or fatal outcomes**

361 Kim YC and Jeong BH [71] found the frequencies of T allele of rs2074192 in the ACE2 gene, and G  
362 allele of rs2298659 in the TMPRSS2 gene to be positively correlated with case fatality rate. Indians  
363 have lowest frequency of rs2074192 [T] (0.222) compared to Africans (0.351), Americans (0.405),  
364 East Asians (0.43) and Europeans (0.432). But they have highest frequency of rs2298659 [G] (0.834)  
365 compared to Africans (0.825), Americans (0.782), Europeans (0.77) and East Asians (0.751). Indians  
366 have lesser frequency of G allele of rs6598045 in the IFITM3 gene (0.159), which is associated with  
367 decreased case fatality rate, compared to Africans (0.299) and Americans (0.222).

368 DES/SPEG genes code for muscle-specific proteins and mutations in these genes are involved with  
369 cardiomyopathies [100, 101]. Acute damage to the heart is a common complication in COVID-19  
370 patients. A allele of rs71040457 that is located downstream of the DES and upstream of the SPEG  
371 genes was found to be associated with an increased risk of COVID-19 mortality in the white British  
372 ancestry population [102]. While East Asians have the lowest frequency of this allele (0.177), Indians  
373 have a lesser frequency (0.276) compared to European (0.376), American (0.385), and African  
374 (0.939) populations.

375 SLC39A10 gene plays an important role in mediating immune cell homeostasis. It has been reported  
376 to facilitate anti-apoptotic signaling during early B-cell development, modulate B-cell receptor signal  
377 strength, and control macrophage survival. rs113892140 located in this gene is associated with an  
378 increased risk of COVID-19 mortality [102]. Risk allele [A] frequency in the Indian population is

379 0.078 (Table 4), which is significantly greater than only the European population (0.046). Its  
380 frequency is highest in the African population (0.256).

381

#### 382 **4.5 COVID-19 related comorbidities**

383 Twelve polymorphisms associated with comorbidities of COVID-19 were also analyzed (Table 5).  
384 Hypertension, coronary artery disease, type 2 diabetes are among the major comorbidities of COVID-  
385 19 severity. rs2074192 [T] is associated with an increased risk of developing hypertension [49]. T  
386 allele frequency in the Indian population (0.222) is least as compared to other populations.

387

### 388 **5 CONCLUSION**

389 The potential role of several polymorphisms in COVID-19 susceptibility and severity suggests that  
390 host genetics plays an important role in the pathology and progression of the infection. We found  
391 multiple genetic variants that might be affecting the COVID-19 susceptibility, immune response,  
392 severity, and mortality. Some of these variants were observed in genetic association studies, while  
393 others were found to be relevant based on gene regulation and signaling pathways.

394 COVID-19 positivity rate in India is one of the least in the world despite India being the second most  
395 populated nation [154, 155]. Due to the high population density in India, the spread of an airborne  
396 pathogen can be limited only to a certain extent [103]. Hence, a low COVID-19 positivity rate in  
397 India might be due to the lower genetic predisposition of Indians to COVID-19 susceptibility. The  
398 fatality rate of COVID-19 in India was relatively high during the peak phases of the first and second  
399 waves. However, when the peaks subsided the fatality rate reduced significantly. Inadequate medical  
400 facilities seem to be one of the major reasons which caused preventable deaths during these periods.  
401 [104]. Thus, the role of genetics in COVID-19 severity risk in the Indian population remains unclear.  
402 More detailed studies are warranted to confirm the COVID-19 related relevance of the variants  
403 discussed in this article. The current study will act as a good source to shortlist variants/genes for  
404 conducting genetic association studies to assess COVID-19 susceptibility, its severity, and mortality.

405

### 406 **6 REFERENCES**

- 407 1. Zhou P, Yang XL, Wang XG, et al. A pneumonia outbreak associated with a new coronavirus  
408 of probable bat origin. *Nature*. 2020;579(7798):270-273. doi:10.1038/s41586-020-2012-7
- 409 2. Zhu N, Zhang D, Wang W, et al. A Novel Coronavirus from Patients with Pneumonia in  
410 China, 2019. *N Engl J Med*. 2020;382(8):727-733. doi:10.1056/NEJMoa2001017
- 411 3. Guo YR, Cao QD, Hong ZS, et al. The origin, transmission and clinical therapies on  
412 coronavirus disease 2019 (COVID-19) outbreak - an update on the status. *Mil Med Res*.  
413 2020;7(1):11. Published 2020 Mar 13. doi:10.1186/s40779-020-00240-0

- 414 4. Huang C, Wang Y, Li X, et al. Clinical features of patients infected with 2019 novel  
415 coronavirus in Wuhan, China [published correction appears in *Lancet*. 2020 Jan 30;:]. *Lancet*.  
416 2020;395(10223):497-506. doi:10.1016/S0140-6736(20)30183-5
- 417 5. Chen N, Zhou M, Dong X, et al. Epidemiological and clinical characteristics of 99 cases of  
418 2019 novel coronavirus pneumonia in Wuhan, China: a descriptive study. *Lancet*.  
419 2020;395(10223):507-513. doi:10.1016/S0140-6736(20)30211-7
- 420 6. Chen T, Wu D, Chen H, et al. Clinical characteristics of 113 deceased patients with  
421 coronavirus disease 2019: retrospective study [published correction appears in *BMJ*. 2020 Mar  
422 31;368:m1295]. *BMJ*. 2020;368:m1091. Published 2020 Mar 26. doi:10.1136/bmj.m1091
- 423 7. Giacomelli A, Pezzati L, Conti F, et al. Self-reported Olfactory and Taste Disorders in  
424 Patients With Severe Acute Respiratory Coronavirus 2 Infection: A Cross-sectional Study. *Clin*  
425 *Infect Dis*. 2020;71(15):889-890. doi:10.1093/cid/ciaa330
- 426 8. Zhang JJ, Cao YY, Tan G, et al. Clinical, radiological, and laboratory characteristics and risk  
427 factors for severity and mortality of 289 hospitalized COVID-19 patients. *Allergy*. 2021;76(2):533-  
428 550. doi:10.1111/all.14496
- 429 9. Rubin SJS, Falkson SR, Degner NR, Blish C. Clinical characteristics associated with COVID-  
430 19 severity in California. *J Clin Transl Sci*. 2020;5(1):e3. Published 2020 Apr 16.  
431 doi:10.1017/cts.2020.40
- 432 10. Riccardo F, Ajelli M, Andrianou XD, et al. Epidemiological characteristics of COVID-19  
433 cases and estimates of the reproductive numbers 1 month into the epidemic, Italy, 28 January to 31  
434 March 2020. *Euro Surveill*. 2020;25(49):2000790. doi:10.2807/1560-7917.ES.2020.25.49.2000790
- 435 11. Cao M, Zhang D, Wang Y, et al. Clinical Features of Patients Infected with the 2019 Novel  
436 Coronavirus (COVID-19) in Shanghai, China. Preprint. medRxiv. 2020;2020.03.04.20030395.  
437 Published 2020 Mar 6. doi:10.1101/2020.03.04.20030395
- 438 12. Jin JM, Bai P, He W, et al. Gender Differences in Patients With COVID-19: Focus on  
439 Severity and Mortality. *Front Public Health*. 2020;8:152. Published 2020 Apr 29.  
440 doi:10.3389/fpubh.2020.00152
- 441 13. Guo L, Shi Z, Zhang Y, et al. Comorbid diabetes and the risk of disease severity or death  
442 among 8807 COVID-19 patients in China: A meta-analysis. *Diabetes Res Clin Pract*.  
443 2020;166:108346. doi:10.1016/j.diabres.2020.108346
- 444 14. Bode B, Garrett V, Messler J, et al. Glycemic Characteristics and Clinical Outcomes of  
445 COVID-19 Patients Hospitalized in the United States [published correction appears in *J Diabetes Sci*  
446 *Technol*. 2020 Jun 10;:1932296820932678]. *J Diabetes Sci Technol*. 2020;14(4):813-821.  
447 doi:10.1177/1932296820924469
- 448 15. Huang S, Wang J, Liu F, et al. COVID-19 patients with hypertension have more severe  
449 disease: a multicenter retrospective observational study. *Hypertens Res*. 2020;43(8):824-831.  
450 doi:10.1038/s41440-020-0485-2

- 451 16. Wang D, Hu B, Hu C, et al. Clinical Characteristics of 138 Hospitalized Patients With 2019  
452 Novel Coronavirus-Infected Pneumonia in Wuhan, China [published correction appears in JAMA.  
453 2021 Mar 16;325(11):1113]. JAMA. 2020;323(11):1061-1069. doi:10.1001/jama.2020.1585
- 454 17. Ran J, Song Y, Zhuang Z, et al. Blood pressure control and adverse outcomes of COVID-19  
455 infection in patients with concomitant hypertension in Wuhan, China. Hypertens Res.  
456 2020;43(11):1267-1276. doi:10.1038/s41440-020-00541-w
- 457 18. Fresán U, Guevara M, Elía F, et al. Independent Role of Severe Obesity as a Risk Factor for  
458 COVID-19 Hospitalization: A Spanish Population-Based Cohort Study. Obesity (Silver Spring).  
459 2021;29(1):29-37. doi:10.1002/oby.23029
- 460 19. Hoiland RL, Fergusson NA, Mitra AR, et al. The association of ABO blood group with  
461 indices of disease severity and multiorgan dysfunction in COVID-19. Blood Adv. 2020;4(20):4981-  
462 4989. doi:10.1182/bloodadvances.2020002623
- 463 20. Pourali F, Afshari M, Alizadeh-Navaei R, Javidnia J, Moosazadeh M, Hessami A.  
464 Relationship between blood group and risk of infection and death in COVID-19: a live meta-analysis.  
465 New Microbes New Infect. 2020;37:100743. doi:10.1016/j.nmni.2020.100743
- 466 21. Garg I, Srivastava S, Dogra V, et al. Potential association of COVID-19 and ABO blood  
467 group: An Indian study. Microb Pathog. 2021;158:105008. doi:10.1016/j.micpath.2021.105008
- 468 22. Kwok AJ, Mentzer A, Knight JC. Host genetics and infectious disease: new tools, insights  
469 and translational opportunities. Nat Rev Genet. 2021;22(3):137-153. doi:10.1038/s41576-020-00297-  
470 6
- 471 23. Di Maria E, Latini A, Borgiani P, Novelli G. Genetic variants of the human host influencing  
472 the coronavirus-associated phenotypes (SARS, MERS and COVID-19): rapid systematic review and  
473 field synopsis. Hum Genomics. 2020;14(1):30. Published 2020 Sep 11. doi:10.1186/s40246-020-  
474 00280-6
- 475 24. Wang F, Huang S, Gao R, et al. Initial whole-genome sequencing and analysis of the host  
476 genetic contribution to COVID-19 severity and susceptibility. Cell Discov. 2020;6(1):83. Published  
477 2020 Nov 10. doi:10.1038/s41421-020-00231-4
- 478 25. Gómez J, Albaiceta GM, Cuesta-Llavona E, et al. The Interferon-induced transmembrane  
479 protein 3 gene (IFITM3) rs12252 C variant is associated with COVID-19. Cytokine.  
480 2021;137:155354. doi:10.1016/j.cyto.2020.155354
- 481 26. Zhang Y, Qin L, Zhao Y, et al. Interferon-Induced Transmembrane Protein 3 Genetic Variant  
482 rs12252-C Associated With Disease Severity in Coronavirus Disease 2019. J Infect Dis.  
483 2020;222(1):34-37. doi:10.1093/infdis/jiaa224
- 484 27. Severe Covid-19 GWAS Group, Ellinghaus D, Degenhardt F, et al. Genomewide Association  
485 Study of Severe Covid-19 with Respiratory Failure. N Engl J Med. 2020;383(16):1522-1534.  
486 doi:10.1056/NEJMoa2020283
- 487 28. Littera R, Campagna M, Deidda S, et al. Human Leukocyte Antigen Complex and Other  
488 Immunogenetic and Clinical Factors Influence Susceptibility or Protection to SARS-CoV-2 Infection

- 489 and Severity of the Disease Course. The Sardinian Experience. *Front Immunol.* 2020;11:605688.  
490 Published 2020 Dec 4. doi:10.3389/fimmu.2020.605688
- 491 29. Yung YL, Cheng CK, Chan HY, et al. Association of HLA-B22 serotype with SARS-CoV-2  
492 susceptibility in Hong Kong Chinese patients. *HLA.* 2021;97(2):127-132. doi:10.1111/tan.14135
- 493 30. Amoroso A, Magistrini P, Vespasiano F, et al. HLA and AB0 Polymorphisms May Influence  
494 SARS-CoV-2 Infection and COVID-19 Severity. *Transplantation.* 2021;105(1):193-200.  
495 doi:10.1097/TP.0000000000003507
- 496 31. Saleh A, Sultan A, Elashry MA, et al. Association of TNF- $\alpha$  G-308 a Promoter  
497 Polymorphism with the Course and Outcome of COVID-19 Patients [published online ahead of print,  
498 2020 Nov 23]. *Immunol Invest.* 2020;1-12. doi:10.1080/08820139.2020.1851709
- 499 32. Java A, Apicelli AJ, Liszewski MK, et al. The complement system in COVID-19: friend and  
500 foe?. *JCI Insight.* 2020;5(15):e140711. Published 2020 Aug 6. doi:10.1172/jci.insight.140711
- 501 33. Valenti L, Griffini S, Lamorte G, et al. Chromosome 3 cluster rs11385942 variant links  
502 complement activation with severe COVID-19 [published correction appears in *J Autoimmun.* 2021  
503 Jun;120:102646]. *J Autoimmun.* 2021;117:102595. doi:10.1016/j.jaut.2021.102595
- 504 34. Srivastava A, Bandopadhyay A, Das D, et al. Genetic Association of ACE2 rs2285666  
505 Polymorphism With COVID-19 Spatial Distribution in India. *Front Genet.* 2020;11:564741.  
506 Published 2020 Sep 25. doi:10.3389/fgene.2020.564741
- 507 35. Ravikanth V, Sasikala M, Naveen V, et al. A variant in TMPRSS2 is associated with  
508 decreased disease severity in COVID-19. *Meta Gene.* 2021;29:100930.  
509 doi:10.1016/j.mgene.2021.100930
- 510 36. Singh PP, Srivastava A, Sultana GNN, et al. The major genetic risk factor for severe COVID-  
511 19 does not show any association among South Asian populations [published correction appears in  
512 *Sci Rep.* 2021 Aug 5;11(1):16296]. *Sci Rep.* 2021;11(1):12346. Published 2021 Jun 11.  
513 doi:10.1038/s41598-021-91711-4
- 514 37. Howie B, Marchini J, Stephens M. Genotype imputation with thousands of genomes. *G3*  
515 (Bethesda). 2011;1(6):457-470. doi:10.1534/g3.111.001198
- 516 38. 1000 Genomes Project Consortium, Auton A, Brooks LD, et al. A global reference for human  
517 genetic variation. *Nature.* 2015;526(7571):68-74. doi:10.1038/nature15393
- 518 39. R Core Team (2020). R: A language and environment for statistical computing. R Foundation  
519 for Statistical Computing, Vienna, Austria. URL <https://www.R-project.org/>
- 520 40. Machiela MJ, Chanock SJ. LDlink: a web-based application for exploring population-specific  
521 haplotype structure and linking correlated alleles of possible functional variants. *Bioinformatics.*  
522 2015;31(21):3555-3557. doi:10.1093/bioinformatics/btv402
- 523 41. GTEx Consortium. The Genotype-Tissue Expression (GTEx) project. *Nat Genet.*  
524 2013;45(6):580-585. doi:10.1038/ng.2653

- 525 42. Smatti MK, Al-Sarraj YA, Albagha O, Yassine HM. Host Genetic Variants Potentially  
526 Associated With SARS-CoV-2: A Multi-Population Analysis. *Front Genet.* 2020;11:578523.  
527 Published 2020 Oct 2. doi:10.3389/fgene.2020.578523
- 528 43. Secolin R, de Araujo TK, Gonsales MC, et al. Genetic variability in COVID-19-related genes  
529 in the Brazilian population. *Hum Genome Var.* 2021;8:15. Published 2021 Apr 2.  
530 doi:10.1038/s41439-021-00146-w
- 531 44. Bhalla V, Blish CA, South AM. A historical perspective on ACE2 in the COVID-19 era. *J*  
532 *Hum Hypertens.* 2021;35(10):935-939. doi:10.1038/s41371-020-00459-3
- 533 45. Santos RAS, Sampaio WO, Alzamora AC, et al. The ACE2/Angiotensin-(1-7)/MAS Axis of  
534 the Renin-Angiotensin System: Focus on Angiotensin-(1-7). *Physiol Rev.* 2018;98(1):505-553.  
535 doi:10.1152/physrev.00023.2016
- 536 46. Calcagnile M, Forgez P, Iannelli A, Bucci C, Alifano M, Alifano P. ACE2 polymorphisms  
537 and individual susceptibility to SARS-CoV-2 infection: insights from an in silico study. Preprint.  
538 bioRxiv. 2020; 2020.04.23.057042v1. Published 2020 April 24. doi: 10.1101/2020.04.23.057042
- 539 47. Lanjanian H, Moazzam-Jazi M, Hedayati M, et al. SARS-CoV-2 infection susceptibility  
540 influenced by ACE2 genetic polymorphisms: insights from Tehran Cardio-Metabolic Genetic Study.  
541 *Sci Rep.* 2021;11(1):1529. Published 2021 Jan 15. doi:10.1038/s41598-020-80325-x
- 542 48. Wu YH, Li JY, Wang C, Zhang LM, Qiao H. The ACE2 G8790A Polymorphism:  
543 Involvement in Type 2 Diabetes Mellitus Combined with Cerebral Stroke. *J Clin Lab Anal.*  
544 2017;31(2):e22033. doi:10.1002/jcla.22033
- 545 49. Bosso M, Thanaraj TA, Abu-Farha M, Alanbaei M, Abubaker J, Al-Mulla F. The Two Faces  
546 of ACE2: The Role of ACE2 Receptor and Its Polymorphisms in Hypertension and COVID-19. *Mol*  
547 *Ther Methods Clin Dev.* 2020;18:321-327. Published 2020 Jun 25. doi:10.1016/j.omtm.2020.06.017
- 548 50. Brest P, Refae S, Mograbi B, Hofman P, Milano G. Host Polymorphisms May Impact SARS-  
549 CoV-2 Infectivity. *Trends Genet.* 2020;36(11):813-815. doi:10.1016/j.tig.2020.08.003
- 550 51. Paniri A, Hosseini MM, Moballegh-Eslam M, Akhavan-Niaki H. Comprehensive in silico  
551 identification of impacts of ACE2 SNPs on COVID-19 susceptibility in different populations. *Gene*  
552 *Rep.* 2021;22:100979. doi:10.1016/j.genrep.2020.100979
- 553 52. Pouladi N, Abdolahi S. Investigating the ACE2 polymorphisms in COVID-19 susceptibility:  
554 An in silico analysis. *Mol Genet Genomic Med.* 2021;9(6):e1672. doi:10.1002/mgg3.1672
- 555 53. Li M, Schifanella L, Larsen PA. Alu retrotransposons and COVID-19 susceptibility and  
556 morbidity. *Hum Genomics.* 2021;15(1):2. Published 2021 Jan 4. doi:10.1186/s40246-020-00299-9
- 557 54. Abdollahi MR, Huang S, Rodriguez S, et al. Homogeneous assay of rs4343, an ACE I/D  
558 proxy, and an analysis in the British Women's Heart and Health Study (BWHHS). *Dis Markers.*  
559 2008;24(1):11-17. doi:10.1155/2008/813679
- 560 55. Schreiber B, Patel A, Verma A. Shedding light on COVID-19: ADAM17 the missing link?.  
561 *American Journal of Therapeutics.* 2021; 28(3),e358-e360.

- 562 56. Bastolla U, Chambers P, Abia D, García-Bermejo ML, Fresno M. Is Covid-19 severity  
563 associated with ACE2 degradation?. Preprint. arXiv. 2021;2102.13210.
- 564 57. Lambert DW, Yarski M, Warner FJ, et al. Tumor necrosis factor-alpha convertase  
565 (ADAM17) mediates regulated ectodomain shedding of the severe-acute respiratory syndrome-  
566 coronavirus (SARS-CoV) receptor, angiotensin-converting enzyme-2 (ACE2). *J Biol Chem.*  
567 2005;280(34):30113-30119. doi:10.1074/jbc.M505111200
- 568 58. Palau V, Riera M, Soler MJ. ADAM17 inhibition may exert a protective effect on COVID-  
569 19. *Nephrol Dial Transplant.* 2020;35(6):1071-1072. doi:10.1093/ndt/gfaa093
- 570 59. Goos M. ADAM-17: the enzyme that does it all. *Crit Rev Biochem Mol Biol.*  
571 2010;45(2):146-169. doi:10.3109/10409231003628015
- 572 60. Zipeto D, Palmeira JDF, Argañaraz GA, Argañaraz ER. ACE2/ADAM17/TMPRSS2  
573 Interplay May Be the Main Risk Factor for COVID-19. *Front Immunol.* 2020;11:576745. Published  
574 2020 Oct 7. doi:10.3389/fimmu.2020.576745
- 575 61. Hoffmann M, Kleine-Weber H, Pöhlmann S. A Multibasic Cleavage Site in the Spike Protein  
576 of SARS-CoV-2 Is Essential for Infection of Human Lung Cells. *Mol Cell.* 2020;78(4):779-784.e5.  
577 doi:10.1016/j.molcel.2020.04.022
- 578 62. Yang X, Yang W, McVey DG, et al. FURIN Expression in Vascular Endothelial Cells Is  
579 Modulated by a Coronary Artery Disease-Associated Genetic Variant and Influences Monocyte  
580 Transendothelial Migration. *J Am Heart Assoc.* 2020;9(4):e014333. doi:10.1161/JAHA.119.014333
- 581 63. Meidaninikjeh S, Sabouni N, Marzouni HZ, Bengar S, Khalili A, Jafari R. Monocytes and  
582 macrophages in COVID-19: Friends and foes. *Life Sci.* 2021;269:119010.  
583 doi:10.1016/j.lfs.2020.119010
- 584 64. Ragia G, Manolopoulos VG. Assessing COVID-19 susceptibility through analysis of the  
585 genetic and epigenetic diversity of ACE2-mediated SARS-CoV-2 entry. *Pharmacogenomics.*  
586 2020;21(18):1311-1329. doi:10.2217/pgs-2020-0092
- 587 65. Dobrindt K, Hoagland DA, Seah C, et al. Common genetic variation in humans impacts in  
588 vitro susceptibility to SARS-CoV-2 infection. Preprint. bioRxiv. 2020;2020.09.20.300574. Published  
589 2020 Sep 21. doi:10.1101/2020.09.20.300574
- 590 66. Varga Z, Flammer AJ, Steiger P, et al. Endothelial cell infection and endotheliitis in COVID-  
591 19. *Lancet.* 2020;395(10234):1417-1418. doi:10.1016/S0140-6736(20)30937-5
- 592 67. Bailey CC, Zhong G, Huang IC, Farzan M. IFITM-Family Proteins: The Cell's First Line of  
593 Antiviral Defense. *Annu Rev Virol.* 2014;1:261-283. doi:10.1146/annurev-virology-031413-085537
- 594 68. Sun Q, Lei N, Lu J, et al. Interferon-induced Transmembrane Protein 3 Prevents Acute  
595 Influenza Pathogenesis in Mice. *Biomed Environ Sci.* 2020;33(5):295-305. doi:10.3967/bes2020.041
- 596 69. Hachim MY, Al Heialy S, Hachim IY, et al. Interferon-Induced Transmembrane Protein  
597 (IFITM3) Is Upregulated Explicitly in SARS-CoV-2 Infected Lung Epithelial Cells. *Front Immunol.*  
598 2020;11:1372. Published 2020 Jun 10. doi:10.3389/fimmu.2020.01372



- 599 70. Shi G, Kenney AD, Kudryashova E, et al. Opposing activities of IFITM proteins in SARS-  
600 CoV-2 infection. *EMBO J.* 2021;40(3):e106501. doi:10.15252/embj.2020106501
- 601 71. Kim YC, Jeong BH. Strong Correlation between the Case Fatality Rate of COVID-19 and the  
602 rs6598045 Single Nucleotide Polymorphism (SNP) of the Interferon-Induced Transmembrane  
603 Protein 3 (IFITM3) Gene at the Population-Level. *Genes (Basel).* 2020;12(1):42. Published 2020 Dec  
604 30. doi:10.3390/genes12010042
- 605 72. Gomes CP, Fernandes DE, Casimiro F, et al. Cathepsin L in COVID-19: From  
606 Pharmacological Evidences to Genetics. *Front Cell Infect Microbiol.* 2020;10:589505. Published  
607 2020 Dec 8. doi:10.3389/fcimb.2020.589505
- 608 73. Zhao MM, Yang WL, Yang FY, et al. Cathepsin L plays a key role in SARS-CoV-2 infection  
609 in humans and humanized mice and is a promising target for new drug development. *Signal  
610 Transduct Target Ther.* 2021;6(1):134. Published 2021 Mar 27. doi:10.1038/s41392-021-00558-8
- 611 74. Romano A, Delvoux B, Fischer DC, Groothuis P. The PROGINS polymorphism of the  
612 human progesterone receptor diminishes the response to progesterone. *J Mol Endocrinol.* 2007;38(1-  
613 2):331-350. doi:10.1677/jme.1.02170
- 614 75. Hoffmann M, Kleine-Weber H, Schroeder S, et al. SARS-CoV-2 Cell Entry Depends on  
615 ACE2 and TMPRSS2 and Is Blocked by a Clinically Proven Protease Inhibitor. *Cell.*  
616 2020;181(2):271-280.e8. doi:10.1016/j.cell.2020.02.052
- 617 76. Sarker J, Das P, Sarker S, Roy AK, Momen AZMR. A Review on Expression, Pathological  
618 Roles, and Inhibition of TMPRSS2, the Serine Protease Responsible for SARS-CoV-2 Spike Protein  
619 Activation. *Scientifica (Cairo).* 2021;2021:2706789. Published 2021 Jul 24.  
620 doi:10.1155/2021/2706789
- 621 77. Clinckemalie L, Spans L, Dubois V, et al. Androgen regulation of the TMPRSS2 gene and  
622 the effect of a SNP in an androgen response element. *Mol Endocrinol.* 2013;27(12):2028-2040.  
623 doi:10.1210/me.2013-1098
- 624 78. Ali N, Fariha KA, Islam F, et al. Assessment of the role of zinc in the prevention of COVID-  
625 19 infections and mortality: A retrospective study in the Asian and European population. *J Med  
626 Virol.* 2021;93(7):4326-4333. doi:10.1002/jmv.26932
- 627 79. Gorman JA, Hundhausen C, Errett JS, et al. The A946T variant of the RNA sensor IFIH1  
628 mediates an interferon program that limits viral infection but increases the risk for autoimmunity. *Nat  
629 Immunol.* 2017;18(7):744-752. doi:10.1038/ni.3766
- 630 80. Maurer M, von Stebut E. Macrophage inflammatory protein-1. *Int J Biochem Cell Biol.*  
631 2004;36(10):1882-1886. doi:10.1016/j.biocel.2003.10.019
- 632 81. Krensky AM, Ahn YT. Mechanisms of disease: regulation of RANTES (CCL5) in renal  
633 disease. *Nat Clin Pract Nephrol.* 2007;3(3):164-170. doi:10.1038/ncpneph0418
- 634 82. Marques RE, Guabiraba R, Russo RC, Teixeira MM. Targeting CCL5 in inflammation.  
635 *Expert Opin Ther Targets.* 2013;17(12):1439-1460. doi:10.1517/14728222.2013.837886

- 636 83. Patterson BK, Seethamraju H, Dhody K, et al. Disruption of the CCL5/RANTES-CCR5  
637 Pathway Restores Immune Homeostasis and Reduces Plasma Viral Load in Critical COVID-19.  
638 Preprint. medRxiv. 2020;2020.05.02.20084673. Published 2020 May 5.  
639 doi:10.1101/2020.05.02.20084673
- 640 84. Coperchini F, Chiovato L, Ricci G, Croce L, Magri F, Rotondi M. The cytokine storm in  
641 COVID-19: Further advances in our understanding the role of specific chemokines involved.  
642 Cytokine Growth Factor Rev. 2021;58:82-91. doi:10.1016/j.cytogfr.2020.12.005
- 643 85. Patterson BK, Seethamraju H, Dhody K, et al. CCR5 inhibition in critical COVID-19 patients  
644 decreases inflammatory cytokines, increases CD8 T-cells, and decreases SARS-CoV2 RNA in  
645 plasma by day 14. Int J Infect Dis. 2021;103:25-32. doi:10.1016/j.ijid.2020.10.101
- 646 86. Dite GS, Murphy NM, Allman R. An integrated clinical and genetic model for predicting risk  
647 of severe COVID-19: A population-based case-control study. PLoS One. 2021;16(2):e0247205.  
648 Published 2021 Feb 16. doi:10.1371/journal.pone.0247205
- 649 87. Zhou X, Chen D, Wang L, et al. Low serum calcium: a new, important indicator of COVID-  
650 19 patients from mild/moderate to severe/critical [published online ahead of print, 2020 Nov 30].  
651 Biosci Rep. 2020;40(12):BSR20202690. doi:10.1042/BSR20202690
- 652 88. Gschwandtner M, Derler R, Midwood KS. More Than Just Attractive: How CCL2 Influences  
653 Myeloid Cell Behavior Beyond Chemotaxis. Front Immunol. 2019;10:2759. Published 2019 Dec 13.  
654 doi:10.3389/fimmu.2019.02759
- 655 89. Coperchini F, Chiovato L, Croce L, Magri F, Rotondi M. The cytokine storm in COVID-19:  
656 An overview of the involvement of the chemokine/chemokine-receptor system. Cytokine Growth  
657 Factor Rev. 2020;53:25-32. doi:10.1016/j.cytogfr.2020.05.003
- 658 90. Stikker B, Stik G, Hendriks RW, Stadhouders R. Severe COVID-19 associated variants  
659 linked to chemokine receptor gene control in monocytes and macrophages. Preprint. bioRxiv.  
660 2021;2021.01.22.427813. Published 2021 Jun 11. doi:10.1101/2021.01.22.427813
- 661 91. Pham MH, Bonello GB, Castiblanco J, et al. The rs1024611 regulatory region polymorphism  
662 is associated with CCL2 allelic expression imbalance. PLoS One. 2012;7(11):e49498.  
663 doi:10.1371/journal.pone.0049498
- 664 92. Bizzotto J, Sanchis P, Abbate M, et al. SARS-CoV-2 Infection Boosts MX1 Antiviral  
665 Effector in COVID-19 Patients. iScience. 2020;23(10):101585. doi:10.1016/j.isci.2020.101585
- 666 93. Azevedo ZM, Moore DB, Lima FC, et al. Tumor necrosis factor (TNF) and lymphotoxin-  
667 alpha (LTA) single nucleotide polymorphisms: importance in ARDS in septic pediatric critically ill  
668 patients. Hum Immunol. 2012;73(6):661-667. doi:10.1016/j.humimm.2012.03.007
- 669 94. Zhu X, Wang Y, Zhang H, et al. Genetic variation of the human  $\alpha$ -2-Heremans-Schmid  
670 glycoprotein (AHSG) gene associated with the risk of SARS-CoV infection. PLoS One.  
671 2011;6(8):e23730. doi:10.1371/journal.pone.0023730
- 672 95. Pairo-Castineira, Erola, Clohisey S, Klaric L, Bretherick AD, Rawlik K, Pasko D, Walker S  
673 et al. Nature. 2021; 591(7848): 92-98. doi:10.1038/s41586-020-03065-y. Epub 2020 Dec 11.

- 674 96. Zhu J, Wu C, Wu L. Associations Between Genetically Predicted Protein Levels and COVID-  
675 19 Severity. *J Infect Dis.* 2021;223(1):19-22. doi:10.1093/infdis/jiaa660
- 676 97. Demir M, Demir F, Aygun H. Vitamin D deficiency is associated with COVID-19 positivity  
677 and severity of the disease. *J Med Virol.* 2021;93(5):2992-2999. doi:10.1002/jmv.26832
- 678 98. Weir EK, Thenappan T, Bhargava M, Chen Y. Does vitamin D deficiency increase the  
679 severity of COVID-19?. *Clin Med (Lond).* 2020;20(4):e107-e108. doi:10.7861/clinmed.2020-0301
- 680 99. Galmés S, Serra F, Palou A. Current State of Evidence: Influence of Nutritional and  
681 Nutrigenetic Factors on Immunity in the COVID-19 Pandemic Framework. *Nutrients.*  
682 2020;12(9):2738. Published 2020 Sep 8. doi:10.3390/nu12092738
- 683 100. Agrawal PB, Pierson CR, Joshi M, et al. SPEG interacts with myotubularin, and its deficiency  
684 causes centronuclear myopathy with dilated cardiomyopathy. *Am J Hum Genet.* 2014;95(2):218-226.  
685 doi:10.1016/j.ajhg.2014.07.004
- 686 101. Brodehl A, Gaertner-Rommel A, Milting H. Molecular insights into cardiomyopathies  
687 associated with desmin (DES) mutations. *Biophys Rev.* 2018;10(4):983-1006. doi:10.1007/s12551-  
688 018-0429-0
- 689 102. Hu J, Li C, Wang S, Li T, Zhang H. Genetic variants are identified to increase risk of  
690 COVID-19 related mortality from UK Biobank data. Preprint. medRxiv. 2020;2020.11.05.20226761.  
691 Published 2020 Nov 9. doi:10.1101/2020.11.05.20226761
- 692 103. Bhadra A, Mukherjee A, Sarkar K. Impact of population density on Covid-19 infected and  
693 mortality rate in India [published online ahead of print, 2020 Oct 14]. *Model Earth Syst Environ.*  
694 2020;1-7. doi:10.1007/s40808-020-00984-7
- 695 104. Asrani P, Eapen MS, Hassan MI, Sohal SS. Implications of the second wave of COVID-19 in  
696 India. *Lancet Respir Med.* 2021;9(9):e93-e94. doi:10.1016/S2213-2600(21)00312-X
- 697 105. Ghafouri-Fard S, Noroozi R, Vafae R, et al. Effects of host genetic variations on response to,  
698 susceptibility and severity of respiratory infections. *Biomed Pharmacother.* 2020;128:110296.  
699 doi:10.1016/j.biopha.2020.110296
- 700 106. Sainz J, Lupiáñez CB, Segura-Catena J, et al. Dectin-1 and DC-SIGN polymorphisms  
701 associated with invasive pulmonary Aspergillus infection. *PLoS One.* 2012;7(2):e32273.  
702 doi:10.1371/journal.pone.0032273
- 703 107. Avendaño-Tamayo E, Rúa A, Parra-Marín MV, et al. Evaluation of variants in IL6R, TLR3,  
704 and DC-SIGN genes associated with dengue in sampled Colombian population. Evaluación de  
705 variantes en los genes IL6R, TLR3 y DC-SIGN asociadas con dengue en una población colombiana  
706 muestreada. *Biomedica.* 2019;39(1):88-101. Published 2019 Mar 31.  
707 doi:10.7705/biomedica.v39i1.4029
- 708 108. Vargas-Alarcón G, Posadas-Sánchez R, Ramírez-Bello J. Variability in genes related to  
709 SARS-CoV-2 entry into host cells (ACE2, TMPRSS2, TMPRSS11A, ELANE, and CTSL) and its  
710 potential use in association studies. *Life Sci.* 2020;260:118313. doi:10.1016/j.lfs.2020.118313

- 711 109. Mortaz E, Tabarsi P, Varahram M, Folkerts G, Adcock IM. The Immune Response and  
712 Immunopathology of COVID-19. *Front Immunol.* 2020;11:2037. Published 2020 Aug 26.  
713 doi:10.3389/fimmu.2020.02037
- 714 110. Solerte SB, Di Sabatino A, Galli M, Fiorina P. Dipeptidyl peptidase-4 (DPP4) inhibition in  
715 COVID-19. *Acta Diabetol.* 2020;57(7):779-783. doi:10.1007/s00592-020-01539-z
- 716 111. Nelson CP, Sama IE, Codd V, et al. Genetic Associations With Plasma Angiotensin  
717 Converting Enzyme 2 Concentration: Potential Relevance to COVID-19 Risk. *Circulation.*  
718 2020;142(11):1117-1119. doi:10.1161/CIRCULATIONAHA.120.049007
- 719 112. Pedersen KB, Chhabra KH, Nguyen VK, Xia H, Lazartigues E. The transcription factor  
720 HNF1 $\alpha$  induces expression of angiotensin-converting enzyme 2 (ACE2) in pancreatic islets from  
721 evolutionarily conserved promoter motifs. *Biochim Biophys Acta.* 2013;1829(11):1225-1235.  
722 doi:10.1016/j.bbagr.2013.09.007
- 723 113. Iyer GR, Samajder S, Zubeda S, et al. Infectivity and Progression of COVID-19 Based on  
724 Selected Host Candidate Gene Variants. *Front Genet.* 2020;11:861. Published 2020 Sep 4.  
725 doi:10.3389/fgene.2020.00861
- 726 114. Prelli Bozzo C, Nchioua R, Volcic M, et al. IFITM proteins promote SARS-CoV-2 infection  
727 and are targets for virus inhibition in vitro. *Nat Commun.* 2021;12(1):4584. Published 2021 Jul 28.  
728 doi:10.1038/s41467-021-24817-y
- 729 115. Zhang Y, Yang H, Li S, Li WD, Wang J, Wang Y. Association analysis framework of genetic  
730 and exposure risks for COVID-19 in middle-aged and elderly adults. *Mech Ageing Dev.*  
731 2021;194:111433. doi:10.1016/j.mad.2021.111433
- 732 116. Evans DM, Zhu G, Dy V, et al. Genome-wide association study identifies loci affecting blood  
733 copper, selenium and zinc. *Hum Mol Genet.* 2013;22(19):3998-4006. doi:10.1093/hmg/ddt239
- 734 117. Spalinger MR, Hai R, Li J, et al. Identification of a Novel Susceptibility Marker for SARS-  
735 CoV-2 Infection in Human Subjects and Risk Mitigation with a Clinically Approved JAK Inhibitor in  
736 Human/Mouse Cells. Preprint. *bioRxiv.* 2020;2020.12.09.416586. Published 2020 Dec 9.  
737 doi:10.1101/2020.12.09.416586
- 738 118. Paniri A, Hosseini MM, Akhavan-Niaki H. First comprehensive computational analysis of  
739 functional consequences of TMPRSS2 SNPs in susceptibility to SARS-CoV-2 among different  
740 populations. *J Biomol Struct Dyn.* 2021;39(10):3576-3593. doi:10.1080/07391102.2020.1767690
- 741 119. Karakas Celik S, Cakmak Genc G, Dursun A. A bioinformatic approach to investigating  
742 cytokine genes and their receptor variants in relation to COVID-19 progression. *Int J Immunogenet.*  
743 2021;48(2):211-218. doi:10.1111/iji.12522
- 744 120. Stairiker CJ, van Meurs M, Leon LG, et al. Heatr9 is an infection responsive gene that affects  
745 cytokine production in alveolar epithelial cells. *PLoS One.* 2020;15(7):e0236195. Published 2020 Jul  
746 17. doi:10.1371/journal.pone.0236195
- 747 121. Montoya MC, Sancho D, Bonello G, et al. Role of ICAM-3 in the initial interaction of T  
748 lymphocytes and APCs. *Nat Immunol.* 2002;3(2):159-168. doi:10.1038/ni753

- 749 122. Hashemi SMA, Thijssen M, Hosseini SY, Tabarraei A, Pourkarim MR, Sarvari J. Human  
750 gene polymorphisms and their possible impact on the clinical outcome of SARS-CoV-2 infection.  
751 Arch Virol. 2021;166(8):2089-2108. doi:10.1007/s00705-021-05070-6
- 752 123. Maiti AK. The African-American population with a low allele frequency of SNP rs1990760  
753 (T allele) in IFIH1 predicts less IFN-beta expression and potential vulnerability to COVID-19  
754 infection. Immunogenetics. 2020;72(6-7):387-391. doi:10.1007/s00251-020-01174-6
- 755 124. Chong WP, Ip WK, Tso GH, et al. The interferon gamma gene polymorphism +874 A/T is  
756 associated with severe acute respiratory syndrome. BMC Infect Dis. 2006;6:82. Published 2006 May  
757 4. doi:10.1186/1471-2334-6-82
- 758 125. Farhan S, Nadeem M, Ahmed RS, Nadeem MT, Arshad MS, and Ullah A. Studying the  
759 impact of nutritional immunology underlying the modulation of immune responses by nutritional  
760 compounds—a review. Food and agricultural immunology. 2016; 27(2):205-229. doi:  
761 org/10.1080/09540105.2015.1079600
- 762 126. Shane B, Pangilinan F, Mills JL, et al. The 677C→T variant of MTHFR is the major genetic  
763 modifier of biomarkers of folate status in a young, healthy Irish population. Am J Clin Nutr.  
764 2018;108(6):1334-1341. doi:10.1093/ajcn/nqy209
- 765 127. Schmiedel BJ, Singh D, Madrigal A, et al. Impact of Genetic Polymorphisms on Human  
766 Immune Cell Gene Expression. Cell. 2018;175(6):1701-1715.e16. doi:10.1016/j.cell.2018.10.022
- 767 128. Smadja DM, Guerin CL, Chocron R, et al. Angiopoietin-2 as a marker of endothelial  
768 activation is a good predictor factor for intensive care unit admission of COVID-19 patients.  
769 Angiogenesis. 2020;23(4):611-620. doi:10.1007/s10456-020-09730-0
- 770 129. Nagy B Jr, Fejes Z, Szentkereszty Z, et al. A dramatic rise in serum ACE2 activity in a  
771 critically ill COVID-19 patient. Int J Infect Dis. 2021;103:412-414. doi:10.1016/j.ijid.2020.11.184
- 772 130. Hamet P, Pausova Z, Attaoua R, et al. SARS-CoV-2 Receptor ACE2 Gene Is Associated with  
773 Hypertension and Severity of COVID 19: Interaction with Sex, Obesity, and Smoking. Am J  
774 Hypertens. 2021;34(4):367-376. doi:10.1093/ajh/hpaa223
- 775 131. Wooster L, Nicholson CJ, Sigurslid HH, Cardenas CLL, Malhotra R. Polymorphisms in the  
776 ACE2 locus associate with severity of COVID-19 infection. Preprint. medRxiv. 2020. doi:  
777 https://doi.org/10.1101/2020.06.18.20135152
- 778 132. Sun BB, Maranville JC, Peters JE, et al. Genomic atlas of the human plasma proteome.  
779 Nature. 2018;558(7708):73-79. doi:10.1038/s41586-018-0175-2
- 780 133. Ali N. Elevated level of C-reactive protein may be an early marker to predict risk for severity  
781 of COVID-19. J Med Virol. 2020;92(11):2409-2411. doi:10.1002/jmv.26097
- 782 134. Du Clos TW. Function of C-reactive protein. Ann Med. 2000;32(4):274-278.  
783 doi:10.3109/07853890009011772

- 784 135. Sheu WH, Wang WC, Wu KD, et al. CRP-level-associated polymorphism rs1205 within the  
785 CRP gene is associated with 2-hour glucose level: The SAPPHiRE study. *Sci Rep.* 2017;7(1):7987.  
786 Published 2017 Aug 11. doi:10.1038/s41598-017-08696-2
- 787 136. Chou SC, Ko HW, Lin YC. CRP/IL-6/IL-10 Single-Nucleotide Polymorphisms Correlate  
788 with the Susceptibility and Severity of Community-Acquired Pneumonia [published correction  
789 appears in *Genet Test Mol Biomarkers.* 2019 Jun;23(6):433]. *Genet Test Mol Biomarkers.*  
790 2016;20(12):732-740. doi:10.1089/gtmb.2016.0156
- 791 137. Chan KY, Ching JC, Xu MS, et al. Association of ICAM3 genetic variant with severe acute  
792 respiratory syndrome. *J Infect Dis.* 2007;196(2):271-280. doi:10.1086/518892
- 793 138. Meyer NJ, Feng R, Li M, et al. IL1RN coding variant is associated with lower risk of acute  
794 respiratory distress syndrome and increased plasma IL-1 receptor antagonist. *Am J Respir Crit Care*  
795 *Med.* 2013;187(9):950-959. doi:10.1164/rccm.201208-1501OC
- 796 139. Magro G. SARS-CoV-2 and COVID-19: Is interleukin-6 (IL-6) the 'culprit lesion' of ARDS  
797 onset? What is there besides Tocilizumab? *SGP130Fc. Cytokine X.* 2020;2(2):100029.  
798 doi:10.1016/j.cyttox.2020.100029
- 799 140. Nakanishi T, Pigazzini S, Degenhardt F, et al. Age-dependent impact of the major common  
800 genetic risk factor for COVID-19 on severity and mortality. Preprint. medRxiv.  
801 2021;2021.03.07.21252875. Published 2021 Mar 12. doi:10.1101/2021.03.07.21252875
- 802 141. Ali RMM, Ghonimy MBI. Post-COVID-19 pneumonia lung fibrosis: a worrisome sequelae in  
803 surviving patients. *The Egyptian Journal of Radiology and Nuclear Medicine.* 2021;52(1):101.  
804 doi:10.1186/s43055-021-00484-3
- 805 142. Seibold MA, Wise AL, Speer MC, et al. A common MUC5B promoter polymorphism and  
806 pulmonary fibrosis. *N Engl J Med.* 2011;364(16):1503-1512. doi:10.1056/NEJMoa1013660
- 807 143. Andolfo I, Russo R, Lasorsa VA, et al. Common variants at 21q22.3 locus influence MX1  
808 and TMPRSS2 gene expression and susceptibility to severe COVID-19. *iScience.*  
809 2021;24(4):102322. doi:10.1016/j.isci.2021.102322
- 810 144. Hu J, Li C, Wang S, Li T, Zhang H. Genetic variants are identified to increase risk of  
811 COVID-19 related mortality from UK Biobank data. *Hum Genomics.* 2021;15(1):10. Published 2021  
812 Feb 3. doi:10.1186/s40246-021-00306-7
- 813 145. Gómez J, Albaiceta GM, García-Clemente M, et al. Angiotensin-converting enzymes (ACE,  
814 ACE2) gene variants and COVID-19 outcome. *Gene.* 2020;762:145102.  
815 doi:10.1016/j.gene.2020.145102
- 816 146. Liu C, Pei J, Lai Y, et al. Association of ACE2 variant rs4646188 with the risks of atrial  
817 fibrillation and cardioembolic stroke in Uygur patients with type 2 diabetes. *BMC Cardiovasc*  
818 *Disord.* 2021;21(1):103. Published 2021 Feb 18. doi:10.1186/s12872-021-01915-9
- 819 147. Pan Y, Wang T, Li Y, et al. Association of ACE2 polymorphisms with susceptibility to  
820 essential hypertension and dyslipidemia in Xinjiang, China. *Lipids Health Dis.* 2018;17(1):241.  
821 Published 2018 Oct 20. doi:10.1186/s12944-018-0890-6

822 148. Luo Y, Liu C, Guan T, et al. Association of ACE2 genetic polymorphisms with hypertension-  
823 related target organ damages in south Xinjiang [published correction appears in *Hypertens Res.* 2019  
824 Jan 23;:]. *Hypertens Res.* 2019;42(5):681-689. doi:10.1038/s41440-018-0166-6

825 149. Kochetova OV, Avzaletdinova DS, Morugova TV, Mustafina OE. Chemokine gene  
826 polymorphisms association with increased risk of type 2 diabetes mellitus in Tatar ethnic group,  
827 Russia. *Mol Biol Rep.* 2019;46(1):887-896. doi:10.1007/s11033-018-4544-6

828 150. polymorphism with tuberculosis susceptibility: A meta-analysis. *Innate Immun.*  
829 2020;26(5):358-363. doi:10.1177/1753425919891662 rs2107538 Sheng YF, Qi Q. Association of  
830 chemotactic chemokine ligand 5

831 151. Lu S, Wang Y, Wang Y, et al. The IL-6 rs1800795 and rs1800796 polymorphisms are  
832 associated with coronary artery disease risk. *J Cell Mol Med.* 2020;24(11):6191-6207.  
833 doi:10.1111/jcmm.15246

834 152. Oosterveer DM, Versmissen J, Defesche JC, et al. Low-density lipoprotein receptor mutations  
835 generate synthetic genome-wide associations. *Eur J Hum Genet.* 2013;21(5):563-566.  
836 doi:10.1038/ejhg.2012.207

837 153. <https://mapmygenome.in/>

838 154. <https://covid19.who.int/>

839 155. <https://ourworldindata.org/coronavirus>

840

841

842

843

844

845

846

847

848

849

850

851

852

853  
854  
855  
856

**Table 1: Genetic variants related to COVID-19 susceptibility.**

<sup>p</sup> Effect allele frequency in Indian population. <sup>q</sup> EAF (India) compared with EAF in other populations (IND – India, EUR – Europe, AMR – America, SAS – South Asia, AFR – Africa, EAS – East Asia. ‘=’ denotes no significant difference between EAF of Indian and the other population. (EA – effect allele, OA – other allele, Ref – references).

| rsid       | Gene   | EA | OA | IND <sup>p</sup><br>(EAF) | AFR<br>(EAF) | AMR<br>(EAF) | EAS<br>(EAF) | EUR<br>(EAF) | SAS<br>(EAF) | EAF comparison <sup>q</sup>       | Effect                                                                                            | Ref          |
|------------|--------|----|----|---------------------------|--------------|--------------|--------------|--------------|--------------|-----------------------------------|---------------------------------------------------------------------------------------------------|--------------|
| rs4343     | ACE    | A  | G  | 0.604                     | 0.805        | 0.607        | 0.68         | 0.435        | 0.627        | EUR < IND = AMR = SAS < EAS < AFR | Increased susceptibility to COVID-19                                                              | 53, 54       |
| rs2285666  | ACE2   | A  | G  | 0.459                     | 0.207        | 0.326        | 0.536        | 0.239        | 0.487        | AFR < EUR < AMR < IND = SAS < EAS | Increased levels of ACE2 in serum; increased susceptibility to COVID-19                           | 48           |
| rs4240157  | ACE2   | T  | C  | 0.69                      | 0.459        | 0.712        | 0.965        | 0.657        | 0.724        | AFR < EUR < IND = AMR = SAS < EAS | Increased expression of ACE2; increased susceptibility to COVID-19                                | 49, 41       |
| rs4646188  | ACE2   | G  | A  | 0.062                     | 0.003        | 0.032        | 0            | 0.136        | 0.061        | EAS < AFR < AMR = SAS = IND < EUR | Increased expression of ACE2; increased susceptibility to COVID-19                                | 50, 51, 41   |
| rs2158083  | ACE2   | T  | C  | 0.76                      | 0.828        | 0.755        | 0.995        | 0.664        | 0.812        | EUR < AMR = IND < SAS < AFR < EAS | Increased expression of PIR and ACE2; increased susceptibility to COVID-19                        | 41, 50       |
| rs1978124  | ACE2   | C  | T  | 0.724                     | 0.902        | 0.71         | 0.995        | 0.544        | 0.792        | EUR < AMR = IND < SAS < AFR < EAS | Increased expression of PIR and ACE2; increased susceptibility to COVID-19                        | 41, 50       |
| rs233574   | ACE2   | T  | C  | 0.176                     | 0.084        | 0.235        | 0.004        | 0.315        | 0.177        | EAS < AFR < IND < SAS < AMR < EUR | Increased expression of ACE2; increased susceptibility to COVID-19                                | 52           |
| rs55790676 | ADAM17 | G  | T  | 0.925                     | 0.919        | 0.866        | 0.98         | 0.816        | 0.904        | EUR < AMR < SAS = AFR = IND < EAS | Decreased ADAM17 expression; increased susceptibility to COVID-19                                 | 41, 50       |
| rs1524668  | ADAM17 | A  | C  | 0.597                     | 0.297        | 0.569        | 0.906        | 0.338        | 0.573        | AFR < EUR < AMR = SAS = IND < EAS | Decreased ADAM17 expression; increased susceptibility to COVID-19                                 | 50, 41       |
| rs2248690  | AHSG   | T  | A  | 0.17                      | 0.278        | 0.365        | 0.161        | 0.244        | 0.177        | EAS = IND = SAS < EUR < AFR < AMR | Decreased AHSG levels and increased SARS-COV susceptibility; increased susceptibility to COVID-19 | 94           |
| rs1532423  | CA1    | G  | A  | 0.494                     | 0.862        | 0.565        | 0.468        | 0.629        | 0.459        | SAS = EAS = IND < AMR < EUR < AFR | Decreased zinc levels; increased susceptibility to COVID-19                                       | 99           |
| rs1996225  | CA5BP1 | T  | C  | 0.541                     | 0.607        | 0.586        | 0.782        | 0.48         | 0.622        | EUR < IND < AMR < AFR < SAS < EAS | Increased expression of ACE2; increased susceptibility to COVID-19                                | 41, 105      |
| rs4060     | CA5BP1 | A  | C  | 0.645                     | 0.692        | 0.69         | 0.931        | 0.544        | 0.702        | EUR < IND = AMR < AFR < SAS < EAS | Increased expression of ACE2; increased susceptibility to COVID-19                                | 41, 105      |
| rs7248637  | CD209  | C  | T  | 0.948                     | 0.624        | 0.903        | 0.685        | 0.885        | 0.83         | AFR < EAS < SAS < EUR < AMR < IND | Increased susceptibility to COVID-19                                                              | 106, 107     |
| rs3128509  | CTSL   | A  | G  | 0.191                     | 0.126        | 0.408        | 0.018        | 0.413        | 0.204        | EAS < AFR < IND = SAS < AMR < EUR | Increased CTSL expression in various tissues; increased susceptibility to COVID-19                | 41, 108      |
| rs17823744 | DMGDH  | A  | G  | 0.94                      | 0.992        | 0.938        | 1            | 0.87         | 0.942        | EUR < AMR = IND = SAS < AFR < EAS | Decreased selenium levels; decreased immune response; increased susceptibility to COVID-19        | 99           |
| rs13015258 | DPP4   | T  | G  | 0.315                     | 0.318        | 0.602        | 0.621        | 0.4          | 0.327        | IND = AFR = SAS < EUR < AMR < EAS | Increased DPP4 (CD26) expression in lungs; increased COVID-19 susceptibility                      | 109, 110, 41 |



|            |                       |    |   |       |       |       |       |       |       |                                   |                                                                                                   |              |
|------------|-----------------------|----|---|-------|-------|-------|-------|-------|-------|-----------------------------------|---------------------------------------------------------------------------------------------------|--------------|
| rs9340799  | ESR1                  | G  | A | 0.377 | 0.265 | 0.272 | 0.193 | 0.308 | 0.373 | EAS < AFR < AMR < EUR < SAS = IND | Potential alteration of expression of ESR-alpha, thereby affecting ACE2 expression                | 64           |
| rs4702     | FURIN                 | A  | G | 0.499 | 0.941 | 0.589 | 0.525 | 0.563 | 0.499 | SAS = IND = EAS < EUR < AMR < AFR | Increased FURIN expression; increased susceptibility to COVID-19                                  | 65           |
| rs4932178  | FURIN                 | T  | C | 0.276 | 0.287 | 0.209 | 0.16  | 0.356 | 0.286 | EAS < AMR < IND = SAS = AFR < EUR | Increased FURIN expression; increased susceptibility to COVID-19                                  | 64, 41       |
| rs71076692 | HNF1A                 | CT | C | 0.313 | 0.592 | 0.48  | 0.487 | 0.456 | 0.369 | IND < SAS < EUR < AMR < EAS < AFR | Increased plasma ACE2 concentration in males; increased susceptibility to COVID-19                | 111, 112     |
| rs9666637  | IFITM3                | T  | A | 0.912 | 0.757 | 0.689 | 0.393 | 0.864 | 0.81  | EAS < AMR < AFR < SAS < EUR < IND | Increased expression of IFITM3 in cultured fibroblast cells; increased susceptibility to COVID-19 | 114, 41, 113 |
| rs11246066 | IFITM3 - LOC105376504 | A  | C | 0.189 | 0.026 | 0.29  | 0.554 | 0.258 | 0.219 | AFR < IND = SAS < EUR < AMR < EAS | Increased IFITM3 expression in whole blood; increased susceptibility to COVID-19                  | 114, 41, 113 |
| rs7931303  | IFITM3 - LOC105376504 | G  | A | 0.398 | 0.077 | 0.526 | 0.558 | 0.676 | 0.422 | AFR < IND = SAS < AMR < EAS < EUR | Increased IFITM1 and IFITM2 expression in whole blood; increased susceptibility to COVID-19       | 114, 41      |
| rs2093932  | KCNT2                 | C  | T | 0.933 | 0.998 | 0.991 | 0.998 | 0.969 | 0.944 | IND = SAS < EUR < AMR < AFR < EAS | Increased susceptibility to COVID-19                                                              | 115          |
| rs35477708 | MX1                   | GA | G | 0.35  | 0.556 | 0.602 | 0.191 | 0.633 | 0.521 | EAS < IND < SAS < AFR < AMR < EUR | Increased TMPRSS2 expression; increased susceptibility to COVID-19                                | 41, 47       |
| rs468259   | MX1                   | C  | G | 0.485 | 0.36  | 0.334 | 0.249 | 0.54  | 0.485 | EAS < AMR < AFR < SAS = IND < EUR | Increased TMPRSS2 expression, increased susceptibility to COVID-19                                | 41, 47       |
| rs363981   | MX1                   | T  | G | 0.261 | 0.104 | 0.29  | 0.01  | 0.484 | 0.249 | EAS < AFR < SAS = IND = AMR < EUR | Increased TMPRSS2 expression, increased susceptibility to COVID-19                                | 41, 47       |
| rs1638369  | MX1                   | T  | G | 0.341 | 0.382 | 0.448 | 0.106 | 0.573 | 0.364 | EAS < IND = SAS = AFR < AMR < EUR | Increased TMPRSS2 expression, increased susceptibility to COVID-19                                | 41, 47       |
| rs469288   | MX1                   | G  | A | 0.551 | 0.443 | 0.468 | 0.348 | 0.588 | 0.547 | EAS < AFR < AMR < SAS = IND = EUR | Increased TMPRSS2 expression, increased susceptibility to COVID-19                                | 41, 47       |
| rs468699   | MX1                   | C  | T | 0.347 | 0.468 | 0.336 | 0.101 | 0.539 | 0.366 | EAS < AMR = IND = SAS < AFR < EUR | Increased TMPRSS2 expression, increased susceptibility to COVID-19                                | 41, 47       |
| rs462698   | MX1                   | A  | G | 0.341 | 0.382 | 0.448 | 0.106 | 0.574 | 0.364 | EAS < IND = SAS = AFR < AMR < EUR | Increased TMPRSS2 expression, increased susceptibility to COVID-19                                | 41, 47       |
| rs4826508  | NBDY                  | C  | T | 0.273 | 0.372 | 0.408 | 0.364 | 0.272 | 0.294 | EUR = IND = SAS < EAS < AFR < AMR | Decreased zinc levels, increased susceptibility to COVID-19                                       | 116, 99      |
| rs1042838  | PGR                   | A  | C | 0.078 | 0.006 | 0.137 | 0.01  | 0.179 | 0.066 | AFR < EAS < SAS = IND < AMR < EUR | Affects PGR protein function, increased susceptibility to COVID-19                                | 53, 74       |
| rs2120019  | PPCDC                 | C  | T | 0.62  | 0.486 | 0.246 | 0.611 | 0.208 | 0.595 | EUR < AMR < AFR < SAS = EAS = IND | Decreased serum zinc levels, increased susceptibility to COVID-19                                 | 99           |
| rs1893217  | PTPN2                 | G  | A | 0.183 | 0.036 | 0.061 | 0.192 | 0.141 | 0.178 | AFR < AMR < EUR < SAS = IND = EAS | Increased ACE2 expression, increased susceptibility to COVID-19                                   | 117, 41      |

|             |                                |                                      |   |       |       |       |       |       |       |                                   |                                                                                                                         |            |
|-------------|--------------------------------|--------------------------------------|---|-------|-------|-------|-------|-------|-------|-----------------------------------|-------------------------------------------------------------------------------------------------------------------------|------------|
| rs35746115  | SDK2                           | C                                    | A | 0.926 | 0.916 | 0.865 | 0.973 | 0.764 | 0.926 | EUR < AMR < AFR = IND = SAS < EAS | Increased risk of COVID-19 susceptibility                                                                               | 115        |
| rs12950851  | SDK2                           | C                                    | T | 0.947 | 0.991 | 0.873 | 0.971 | 0.769 | 0.914 | EUR < AMR < SAS < IND < EAS < AFR | Increased risk of COVID-19 susceptibility                                                                               | 115        |
| rs461194    | TMPRSS2                        | G                                    | C | 0.916 | 0.995 | 0.772 | 0.653 | 0.969 | 0.887 | EAS < AMR < SAS < IND < EUR < AFR | Predicted to alter the splicing silencer motif of TMPRSS2 which is likely to affect TMPRSS2 structure and function      | 118        |
| rs456016    | TMPRSS2                        | T                                    | C | 0.056 | 0.02  | 0.231 | 0.349 | 0.019 | 0.075 | EUR < AFR < IND = SAS < AMR < EAS | Predicted to modify and/or create splice enhancer site, donor site and silencer site thereby affecting TMPRSS2 splicing | 118        |
| rs467375    | TMPRSS2                        | A                                    | G | 0.372 | 0.093 | 0.239 | 0.006 | 0.441 | 0.384 | EAS < AFR < AMR < IND = SAS < EUR | Increased TMPRSS2 expression in lungs, increased susceptibility to COVID-19                                             | 41, 47     |
| rs2094881   | TMPRSS2                        | C                                    | T | 0.681 | 0.476 | 0.509 | 0.256 | 0.748 | 0.676 | EAS < AFR < AMR < SAS = IND < EUR | Predicted to modify the splice enhancer site in TMPRSS2 gene, potentially affecting TMPRSS2 expression                  | 118        |
| rs4818239   | TMPRSS2                        | C                                    | T | 0.425 | 0.25  | 0.336 | 0.008 | 0.502 | 0.446 | EAS < AFR < AMR < IND = SAS < EUR | Increased TMPRSS2 expression in lungs, increased susceptibility to COVID-19                                             | 41, 47     |
| rs35899679  | TMPRSS2                        | A                                    | C | 0.374 | 0.107 | 0.288 | 0.007 | 0.463 | 0.384 | EAS < AFR < AMR < IND = SAS < EUR | Increased TMPRSS2 expression in lungs, increased susceptibility to COVID-19                                             | 41, 47     |
| rs12627374  | TMPRSS2                        | C                                    | T | 0.884 | 0.995 | 0.996 | 0.85  | 0.998 | 0.863 | EAS = SAS = IND < AFR < AMR < EUR | Binding site for hsa-miR-345 created, might be altering TMPRSS2 expression                                              | 108        |
| rs8134378   | TMPRSS2                        | G                                    | A | 0.949 | 0.821 | 0.951 | 0.999 | 0.885 | 0.922 | AFR < EUR < SAS < IND = AMR < EAS | Increased TMPRSS2 expression, increased susceptibility to COVID-19                                                      | 77, 64, 41 |
| rs140092351 | LOC101928923                   | GTT<br>TCT<br>CTA<br>GTT<br>TGG<br>A | G | 0.143 | 0.597 | 0.334 | 0.228 | 0.223 | 0.148 | IND = SAS < EUR < EAS < AMR < AFR | Increased susceptibility to COVID-19                                                                                    | 115        |
| rs80066318  | LOC105370282 -<br>LOC105370283 | G                                    | A | 0.214 | 0.382 | 0.03  | 0.168 | 0.032 | 0.303 | AMR < EUR < EAS < IND < SAS < AFR | Increased susceptibility to COVID-19                                                                                    | 115        |
| rs56248709  | LOC105374172 -<br>LOC100419750 | C                                    | T | 0.071 | 0.263 | 0.094 | 0.031 | 0.153 | 0.073 | EAS < IND = SAS = AMR < EUR < AFR | Increased susceptibility to COVID-19                                                                                    | 115        |
| rs62436931  | LOC105378093                   | C                                    | T | 0.16  | 0.122 | 0.174 | 0     | 0.278 | 0.142 | EAS < AFR < SAS = IND = AMR < EUR | Increased susceptibility to COVID-19                                                                                    | 115        |

857  
858  
859  
860  
861  
862  
863

864  
865  
866  
867

**Table 2: Genetic variants related to host immune response to SARS-CoV2 infection.**

<sup>p</sup> Effect allele frequency in Indian population. <sup>q</sup> EAF (India) compared with EAF in other populations (IND – India, EUR – Europe, AMR – America, SAS – South Asia, AFR – Africa, EAS – East Asia. ‘=’ denotes no significant difference between EAF of Indian and the other population. (EA – effect allele, OA – other allele, Ref – references).

| rsid       | Gene              | EA | OA | IND <sup>p</sup><br>(EAF) | AFR<br>(EAF) | AMR<br>(EAF) | EAS<br>(EAF) | EUR<br>(EAF) | SAS<br>(EAF) | EAF comparison <sup>q</sup>       | Literature data                                                                                | Ref              |
|------------|-------------------|----|----|---------------------------|--------------|--------------|--------------|--------------|--------------|-----------------------------------|------------------------------------------------------------------------------------------------|------------------|
| rs1719152  | CCL4              | A  | T  | 0.121                     | 0.049        | 0.118        | 0.276        | 0.249        | 0.228        | AFR < AMR = IND < SAS < EUR < EAS | Increased CCL4 and CCL3 expression in lungs, might be causing impaired immune response         | 41, 119          |
| rs3817655  | CCL5              | A  | T  | 0.873                     | 0.546        | 0.78         | 0.679        | 0.841        | 0.823        | AFR < EAS < AMR < SAS < EUR = IND | Increased CCL5 expression in whole blood, might be causing impaired immune response            | 41, 83, 42       |
| rs2107538  | CCL5              | T  | C  | 0.281                     | 0.451        | 0.225        | 0.322        | 0.161        | 0.309        | EUR < AMR < IND = SAS = EAS < AFR | Decreased CCL5 levels in whole blood, might be causing impaired immune response                | 41, 105          |
| rs1015164  | CCRL2 - LINC02009 | G  | A  | 0.753                     | 0.953        | 0.777        | 0.813        | 0.683        | 0.717        | EUR < SAS = IND = AMR < EAS < AFR | Increased CCR1 expression in whole blood, might be causing impaired immune response            | 41, 90           |
| rs2306630  | HEATR9            | A  | G  | 0.099                     | 0.191        | 0.199        | 0.308        | 0.111        | 0.108        | IND = SAS = EUR < AFR < AMR < EAS | Decreased HEATR9 and CCL5 expression in whole blood, might be causing impaired immune response | 41, 120          |
| rs4611572  | ICAM3 - TYK2      | G  | C  | 0.575                     | 0.38         | 0.486        | 0.658        | 0.579        | 0.547        | AFR < AMR < SAS = IND = EUR < EAS | Decreased ICAM3 expression, might be causing impaired immune response                          | 121, 41, 42, 122 |
| rs1990760  | IFIH1             | T  | C  | 0.516                     | 0.126        | 0.39         | 0.187        | 0.605        | 0.564        | AFR < EAS < AMR < IND < SAS < EUR | Protects against viral infection                                                               | 79, 123          |
| rs2430561  | IFNG              | A  | T  | 0.364                     | 0.167        | 0.254        | 0.159        | 0.462        | 0.39         | EAS < AFR < AMR < IND = SAS < EUR | Increased SARS susceptibility                                                                  | 124              |
| rs1024611  | LINC01989 - CCL2  | G  | A  | 0.316                     | 0.228        | 0.486        | 0.547        | 0.316        | 0.321        | AFR < EUR = IND = SAS < AMR < EAS | Increased CCL2 expression, might be causing impaired immune response                           | 91               |
| rs1994182  | MMP28             | G  | C  | 0.341                     | 0.651        | 0.295        | 0.572        | 0.167        | 0.38         | EUR < AMR = IND = SAS < EAS < AFR | Decreased CCL5 levels in whole blood, might be causing impaired immune response                | 41, 42, 89       |
| rs3826404  | MMP28             | G  | T  | 0.272                     | 0.362        | 0.213        | 0.315        | 0.165        | 0.31         | EUR < AMR < IND = SAS = EAS < AFR | Decreased CCL5 expression in whole blood, might be causing impaired immune response            | 41, 42, 89       |
| rs1801133  | MTHFR             | A  | G  | 0.165                     | 0.09         | 0.474        | 0.296        | 0.365        | 0.119        | AFR < SAS < IND < EAS < EUR < AMR | Decreased serum folate levels, might be causing impaired immune response                       | 125, 126, 99     |
| rs13303010 | NOC2L             | G  | A  | 0.142                     | 0.837        | 0.303        | 0.292        | 0.098        | 0.125        | EUR < SAS = IND < EAS < AMR < AFR | Increased PLEKHN1 expression in CD4 T-cells (T cell, CD4, TFH)                                 | 127              |
| rs2526327  | RDM1              | A  | G  | 0.273                     | 0.444        | 0.202        | 0.21         | 0.145        | 0.293        | EUR < AMR < EAS < IND = SAS < AFR | Decreased CCL5 expression in whole blood, might be causing impaired immune response            | 41, 42           |
| rs2769264  | SELENBP1          | T  | G  | 0.792                     | 0.703        | 0.588        | 0.714        | 0.839        | 0.785        | AMR < AFR < EAS < SAS = IND < EUR | Decreased levels of copper in serum, might be causing impaired immune response                 | 116              |
| rs1175550  | SMIM1             | A  | G  | 0.842                     | 0.399        | 0.846        | 0.998        | 0.781        | 0.857        | AFR < EUR < IND = AMR = SAS < EAS | Decreased levels of copper in serum, might be causing impaired immune response                 | 99, 41           |

868  
869  
870  
871  
872  
873

|           |          |   |   |       |       |       |       |       |       |                                   |                                              |         |
|-----------|----------|---|---|-------|-------|-------|-------|-------|-------|-----------------------------------|----------------------------------------------|---------|
| rs4239252 | TAF15    | A | G | 0.32  | 0.607 | 0.288 | 0.456 | 0.162 | 0.366 | EUR < AMR = IND = SAS < EAS < AFR | Increased expression of CCL5 in whole blood  | 41, 42  |
| rs1061622 | TNFRSF1B | G | T | 0.249 | 0.187 | 0.127 | 0.15  | 0.218 | 0.276 | AMR < EAS < AFR < EUR = IND = SAS | Increased TNFRSF1B expression in whole blood | 41, 119 |

**Table 3: Genetic variants related to COVID-19 severity.**

<sup>p</sup> Effect allele frequency in Indian population. <sup>q</sup> EAF (India) compared with EAF in other populations (IND – India, EUR – Europe, AMR – America, SAS – South Asia, AFR – Africa, EAS – East Asia. ‘=’ denotes no significant difference between EAF of Indian and the other population. (EA – effect allele, OA – other allele, Ref – references).

| rsid       | Gene     | EA | OA | IND <sup>p</sup><br>(EAF) | AFR<br>(EAF) | AMR<br>(EAF) | EAS<br>(EAF) | EUR<br>(EAF) | SAS<br>(EAF) | EAF comparison <sup>q</sup>       | Effect                                                                                                                                                 | Ref                |
|------------|----------|----|----|---------------------------|--------------|--------------|--------------|--------------|--------------|-----------------------------------|--------------------------------------------------------------------------------------------------------------------------------------------------------|--------------------|
| rs2519093  | ABO      | T  | C  | 0.128                     | 0.087        | 0.121        | 0.19         | 0.185        | 0.134        | AFR < AMR = IND = SAS < EUR < EAS | Increased risk of COVID-19 severity                                                                                                                    | 96, 128, 129       |
| rs2074192  | ACE2     | T  | C  | 0.222                     | 0.351        | 0.405        | 0.43         | 0.432        | 0.227        | IND < SAS < AFR < AMR < EAS < EUR | Increased risk of COVID-19 severity                                                                                                                    | 130                |
| rs4240157  | ACE2     | T  | C  | 0.69                      | 0.459        | 0.712        | 0.965        | 0.657        | 0.724        | AFR < EUR < IND = AMR = SAS < EAS | Increased hospitalization due to COVID-19, increased risk of COVID-19 severity                                                                         | 131                |
| rs13282163 | ADAM9    | A  | C  | 0.94                      | 0.995        | 0.944        | 0.915        | 0.912        | 0.839        | SAS < EUR < EAS < IND = AMR < AFR | Increased risk of COVID-19 severity                                                                                                                    | 86                 |
| rs12692386 | ADAM17   | G  | A  | 0.509                     | 0.983        | 0.484        | 0.219        | 0.669        | 0.531        | EAS < AMR = IND = SAS < EUR < AFR | Increased ADAM17 expression in severe sepsis, increased risk of COVID-19 severity                                                                      | 50, 41             |
| rs2765013  | AGO1     | C  | T  | 0.881                     | 0.477        | 0.61         | 0.364        | 0.913        | 0.864        | EAS < AFR < AMR < SAS < IND = EUR | Increased risk of COVID-19 severity                                                                                                                    | 86                 |
| rs1892429  | ANKRD30A | A  | G  | 0.907                     | 0.992        | 0.759        | 0.917        | 0.757        | 0.912        | EUR < AMR < IND = SAS = EAS < AFR | Increased risk of COVID-19 severity                                                                                                                    | 86                 |
| rs10039856 | ARHGAP26 | C  | T  | 0.813                     | 0.555        | 0.847        | 0.324        | 0.915        | 0.794        | EAS < AFR < SAS = IND = AMR < EUR | Increased risk of COVID-19 severity                                                                                                                    | 86                 |
| rs7787942  | C1GALT1  | T  | A  | 0.297                     | 0.828        | 0.46         | 0.699        | 0.466        | 0.293        | SAS = IND < AMR < EUR < EAS < AFR | Increased C1GALT1C1 protein levels in blood serum, and associated with COVID-19 severity                                                               | 132, 96            |
| rs1205     | CRP      | C  | T  | 0.692                     | 0.83         | 0.625        | 0.434        | 0.69         | 0.667        | EAS < AMR < SAS = EUR = IND < AFR | Increased serum CRP levels, one of the major hallmarks of severe COVID-19, associated with susceptibility and severity of community acquired pneumonia | 133, 134, 135, 136 |
| rs3774882  | EVC      | C  | G  | 0.848                     | 0.687        | 0.937        | 0.9          | 0.93         | 0.781        | AFR < SAS < IND < EAS < EUR < AMR | Increased risk of COVID-19 severity                                                                                                                    | 86                 |
| rs3774881  | EVC      | T  | C  | 0.786                     | 0.193        | 0.64         | 0.751        | 0.857        | 0.745        | AFR < AMR < SAS = EAS = IND < EUR | Increased risk of COVID-19 severity                                                                                                                    | 86                 |
| rs17514846 | FURIN    | A  | C  | 0.371                     | 0.883        | 0.295        | 0.159        | 0.461        | 0.39         | EAS < AMR < IND = SAS < EUR < AFR | Increased FURIN expression in vascular endothelial cells, increased risk of COVID-19 severity                                                          | 62, 64             |
| rs1155563  | GC       | C  | T  | 0.296                     | 0.057        | 0.186        | 0.336        | 0.244        | 0.316        | AFR < AMR < EUR < IND = SAS = EAS | Decreased serum vitamin-D levels, increased risk of COVID-19 severity                                                                                  | 99                 |

|             |                    |   |    |       |       |       |       |       |       |                                   |                                                                                                                                                                       |               |
|-------------|--------------------|---|----|-------|-------|-------|-------|-------|-------|-----------------------------------|-----------------------------------------------------------------------------------------------------------------------------------------------------------------------|---------------|
| rs3895472   | GLIS3 - RNU6-694P  | C | T  | 0.896 | 0.796 | 0.915 | 0.992 | 0.936 | 0.889 | AFR < SAS = IND = AMR < EUR < EAS | Increased risk of COVID-19 severity                                                                                                                                   | 86            |
| rs1799945   | HFE                | C | G  | 0.912 | 0.989 | 0.885 | 0.971 | 0.828 | 0.929 | EUR < AMR = IND = SAS < EAS < AFR | Decreased iron bioavailability, increased risk of COVID-19 severity                                                                                                   | 99            |
| rs10755709  | HIVEP1             | A | G  | 0.176 | 0.634 | 0.69  | 0.591 | 0.7   | 0.572 | IND < SAS < EAS < AFR < AMR < EUR | Increased risk of COVID-19 severity                                                                                                                                   | 86            |
| rs9380142   | HLA-G              | A | G  | 0.84  | 0.809 | 0.719 | 0.651 | 0.656 | 0.85  | EAS < EUR < AMR < AFR < IND = SAS | Increased risk of COVID-19 severity                                                                                                                                   | 95            |
| rs2304237   | ICAM3              | C | T  | 0.261 | 0.141 | 0.174 | 0.113 | 0.234 | 0.248 | EAS < AFR < AMR < EUR = SAS = IND | Increased risk of COVID-19 severity                                                                                                                                   | 137           |
| rs2236757   | IFNAR2             | A | G  | 0.425 | 0.193 | 0.428 | 0.565 | 0.294 | 0.468 | AFR < EUR < IND = AMR = SAS < EAS | Increased risk of COVID-19 severity                                                                                                                                   | 95            |
| rs13050728  | IFNAR2             | T | C  | 0.487 | 0.194 | 0.451 | 0.576 | 0.333 | 0.519 | AFR < EUR < AMR = IND = SAS < EAS | Increased risk of COVID-19 severity                                                                                                                                   | 95            |
| rs2270360   | IGFBP2             | A | C  | 0.927 | 0.976 | 0.659 | 0.585 | 0.695 | 0.776 | EAS < AMR < EUR < SAS < IND < AFR | Increased risk of COVID-19 severity                                                                                                                                   | 86            |
| rs1800872   | IL10               | T | G  | 0.435 | 0.436 | 0.333 | 0.676 | 0.24  | 0.458 | EUR < AMR < IND = AFR = SAS < EAS | Increased risk of COVID-19 severity                                                                                                                                   | 136, 105, 41  |
| rs315952    | IL1RN              | T | C  | 0.887 | 0.534 | 0.785 | 0.444 | 0.72  | 0.851 | EAS < AFR < EUR < AMR < SAS < IND | Increased risk of developing acute respiratory distress syndrome (ARDS)                                                                                               | 138           |
| rs1800797   | IL6                | A | G  | 0.17  | 0.017 | 0.184 | 0.001 | 0.408 | 0.134 | EAS < AFR < SAS = IND = AMR < EUR | Increased risk of severe community acquired pneumonia and increased IL6 expression in cultured fibroblast cells, might be associated with increased COVID-19 severity | 139, 136, 41  |
| rs10766439  | KCNQ1DN - CDKN1C   | A | G  | 0.351 | 0.241 | 0.199 | 0.008 | 0.365 | 0.374 | EAS < AMR < AFR < IND = EUR = SAS | Increased risk of COVID-19 severity                                                                                                                                   | 86            |
| rs1870377   | KDR - VEGFR2       | A | T  | 0.173 | 0.09  | 0.131 | 0.465 | 0.235 | 0.149 | AFR < AMR = SAS = IND < EUR < EAS | Decreased stability of VEGFR2, contributing to COVID-19 progression or pathogenesis                                                                                   | 119           |
| rs4240376   | LINC01170 - ZNF608 | G | T  | 0.69  | 0.887 | 0.713 | 0.578 | 0.789 | 0.704 | EAS < IND = SAS = AMR < EUR < AFR | Increased risk of COVID-19 severity                                                                                                                                   | 86            |
| rs1800630   | LTA - TNF          | A | C  | 0.283 | 0.1   | 0.134 | 0.164 | 0.145 | 0.241 | AFR < AMR < EUR < EAS < SAS = IND | Increased risk of developing acute respiratory distress syndrome (ARDS), increased risk of COVID-19 severity                                                          | 93            |
| rs10490770  | LZTFL1             | C | T  | 0.251 | 0.004 | 0.043 | 0.005 | 0.081 | 0.296 | AFR < EAS < AMR < EUR < IND = SAS | Increased risk of COVID-19 severity, COVID-19 related severe respiratory failure, COVID-19 related Venous thromboembolism and COVID-19 related hepatic injury         | 140           |
| rs113791144 | MGAT1              | T | C  | 0.194 | 0.043 | 0.143 | 0.036 | 0.083 | 0.168 | EAS < AFR < EUR < AMR < SAS = IND | Increased risk of COVID-19 severity                                                                                                                                   | 86            |
| rs35619543  | MUC5B              | T | G  | 0.085 | 0.362 | 0.245 | 0.033 | 0.26  | 0.195 | EAS < IND < SAS < AMR < EUR < AFR | Increased risk of pulmonary fibrosis, increased risk of COVID-19 severity                                                                                             | 141, 142, 113 |
| rs35477708  | MX1                | G | GA | 0.65  | 0.444 | 0.398 | 0.809 | 0.367 | 0.479 | EUR < AMR < AFR < SAS < IND < EAS | Decreased MX1 expression, increased risk of COVID-19 severity                                                                                                         | 41, 47        |

|            |                         |   |   |       |       |       |       |       |       |                                   |                                                               |          |
|------------|-------------------------|---|---|-------|-------|-------|-------|-------|-------|-----------------------------------|---------------------------------------------------------------|----------|
| rs468259   | MX1                     | G | C | 0.515 | 0.64  | 0.666 | 0.751 | 0.46  | 0.515 | EUR < IND = SAS < AFR < AMR < EAS | Decreased MX1 expression, increased risk of COVID-19 severity | 41, 47   |
| rs363981   | MX1                     | G | T | 0.739 | 0.896 | 0.71  | 0.99  | 0.516 | 0.751 | EUR < AMR = IND = SAS < AFR < EAS | Decreased MX1 expression, increased risk of COVID-19 severity | 41, 47   |
| rs1638369  | MX1                     | G | T | 0.659 | 0.618 | 0.552 | 0.894 | 0.427 | 0.636 | EUR < AMR < AFR = SAS = IND < EAS | Decreased MX1 expression, increased risk of COVID-19 severity | 41, 47   |
| rs469288   | MX1                     | A | G | 0.449 | 0.557 | 0.532 | 0.652 | 0.412 | 0.453 | EUR = IND = SAS < AMR < AFR < EAS | Decreased MX1 expression, increased risk of COVID-19 severity | 41, 47   |
| rs468699   | MX1                     | T | C | 0.653 | 0.532 | 0.664 | 0.899 | 0.461 | 0.634 | EUR < AFR < SAS = IND = AMR < EAS | Decreased MX1 expression, increased risk of COVID-19 severity | 41, 47   |
| rs462698   | MX1                     | G | A | 0.659 | 0.618 | 0.552 | 0.894 | 0.426 | 0.636 | EUR < AMR < AFR = SAS = IND < EAS | Decreased MX1 expression, increased risk of COVID-19 severity | 41       |
| rs10735079 | OAS1-OAS3               | A | G | 0.698 | 0.812 | 0.756 | 0.748 | 0.636 | 0.717 | EUR < IND = SAS < EAS < AMR < AFR | Increased risk of COVID-19 severity                           | 95       |
| rs10808999 | PLEKHA2                 | G | A | 0.861 | 0.977 | 0.925 | 0.921 | 0.859 | 0.883 | EUR = IND = SAS < EAS < AMR < AFR | Increased risk of COVID-19 severity                           | 86       |
| rs6065904  | PLTP                    | A | G | 0.325 | 0.212 | 0.38  | 0.337 | 0.244 | 0.35  | AFR < EUR < IND = EAS = SAS < AMR | Increased risk of COVID-19 severity                           | 96, 132  |
| rs2010843  | RDH10-AS1               | C | T | 0.539 | 0.066 | 0.659 | 0.628 | 0.556 | 0.538 | AFR < SAS = IND = EUR < EAS < AMR | Increased risk of COVID-19 severity                           | 86       |
| rs2238187  | RGS6                    | G | A | 0.308 | 0.185 | 0.29  | 0.624 | 0.389 | 0.3   | AFR < AMR = SAS = IND < EUR < EAS | Increased risk of COVID-19 severity                           | 86       |
| rs12083278 | RPL21P22 - LOC107984935 | C | G | 0.941 | 0.83  | 0.637 | 0.721 | 0.642 | 0.843 | AMR < EUR < EAS < AFR < SAS < IND | Increased risk of COVID-19 severity                           | 86       |
| rs2229117  | RYR3                    | G | C | 0.913 | 0.969 | 0.824 | 0.963 | 0.867 | 0.918 | AMR < EUR < IND = SAS < EAS < AFR | Increased risk of COVID-19 severity                           | 86       |
| rs12593288 | RYR3                    | C | T | 0.805 | 0.976 | 0.738 | 0.486 | 0.811 | 0.71  | EAS < SAS < AMR < IND = EUR < AFR | Increased risk of COVID-19 severity                           | 86       |
| rs34761447 | STX8                    | C | T | 0.851 | 0.992 | 0.951 | 0.815 | 0.905 | 0.788 | SAS < EAS = IND < EUR < AMR < AFR | Increased risk of COVID-19 severity                           | 86       |
| rs2220543  | SUMO2P6 - LOC105377740  | T | A | 0.548 | 0.585 | 0.633 | 0.491 | 0.704 | 0.512 | EAS < SAS = IND = AFR < AMR < EUR | Increased risk of COVID-19 severity                           | 86       |
| rs2274122  | TEKT2                   | A | G | 0.662 | 0.191 | 0.519 | 0.27  | 0.82  | 0.613 | AFR < EAS < AMR < SAS < IND < EUR | Increased risk of COVID-19 severity                           | 86       |
| rs12329760 | TMPRSS2                 | T | C | 0.243 | 0.287 | 0.154 | 0.362 | 0.236 | 0.226 | AMR < SAS = EUR = IND < AFR < EAS | Increased risk of COVID-19 severity                           | 143      |
| rs2094881  | TMPRSS2                 | C | T | 0.681 | 0.476 | 0.509 | 0.256 | 0.748 | 0.676 | EAS < AFR < AMR < SAS = IND < EUR | Increased risk of COVID-19 severity                           | 118, 143 |
| rs60744406 | ZNF155                  | G | A | 0.505 | 0.18  | 0.376 | 0.257 | 0.571 | 0.492 | AFR < EAS < AMR < SAS < IND < EUR | Increased risk of COVID-19 severity                           | 86       |

|            |                                        |   |   |       |       |       |       |       |       |                                   |                                     |     |
|------------|----------------------------------------|---|---|-------|-------|-------|-------|-------|-------|-----------------------------------|-------------------------------------|-----|
| rs71481792 | LINC02676<br>-<br>LOC10192<br>8272     | A | T | 0.615 | 0.762 | 0.51  | 0.65  | 0.35  | 0.626 | EUR < AMR < IND = SAS = EAS < AFR | Increased risk of COVID-19 severity | 86  |
| rs1984162  | LOC10537<br>0111 -<br>LOC10537<br>0112 | G | A | 0.173 | 0.222 | 0.187 | 0.083 | 0.269 | 0.176 | EAS < IND = SAS = AMR < AFR < EUR | Increased risk of COVID-19 severity | 86  |
| rs9386484  | LOC10537<br>7923                       | T | A | 0.789 | 0.616 | 0.548 | 0.637 | 0.72  | 0.615 | AMR < SAS < AFR < EAS < EUR < IND | Increased risk of COVID-19 severity | 86  |
| rs7027911  | LOC10798<br>7083 -<br>MTCO1P5<br>0     | A | G | 0.535 | 0.887 | 0.569 | 0.662 | 0.417 | 0.517 | EUR < SAS = IND = AMR < EAS < AFR | Increased risk of COVID-19 severity | 86  |
| rs12133284 | LOC11226<br>8258                       | T | A | 0.148 | 0.34  | 0.14  | 0.013 | 0.233 | 0.148 | EAS < AMR = IND = SAS < EUR < AFR | Increased risk of COVID-19 severity | 115 |

874  
875  
876  
877  
878  
879

**Table 4: Genetic variants related to COVID-19 related fatal outcomes or mortality.**

<sup>p</sup> Effect allele frequency in Indian population. <sup>q</sup> EAF (India) compared with EAF in other populations (IND – India, EUR – Europe, AMR – America, SAS – South Asia, AFR – Africa, EAS – East Asia. ‘=’ denotes no significant difference between EAF of Indian and the other population. (EA – effect allele, OA – other allele, Ref – references).

| rsid        | Gene                | EA | OA | IND <sup>p</sup><br>(EAF) | AFR<br>(EAF) | AMR<br>(EAF) | EAS<br>(EAF) | EUR<br>(EAF) | SAS<br>(EAF) | EAF comparison <sup>q</sup>       | Effect                                       | Ref |
|-------------|---------------------|----|----|---------------------------|--------------|--------------|--------------|--------------|--------------|-----------------------------------|----------------------------------------------|-----|
| rs2074192   | ACE2                | T  | C  | 0.222                     | 0.351        | 0.405        | 0.43         | 0.432        | 0.227        | IND < SAS < AFR < AMR < EAS < EUR | Increased risk of COVID-19 related mortality | 71  |
| rs2874140   | CPQ                 | T  | A  | 0.336                     | 0.419        | 0.287        | 0.627        | 0.21         | 0.328        | EUR < AMR = SAS = IND < AFR < EAS | Increased risk of COVID-19 related mortality | 102 |
| rs71040457  | DES -<br>SPEG       | A  | AG | 0.276                     | 0.939        | 0.385        | 0.177        | 0.376        | 0.293        | EAS < IND = SAS < EUR < AMR < AFR | Increased risk of COVID-19 related mortality | 102 |
| rs6598045   | IFITM3              | A  | G  | 0.841                     | 0.701        | 0.778        | 0.859        | 0.894        | 0.723        | AFR < SAS < AMR < IND < EAS < EUR | Increased risk of COVID-19 related mortality | 71  |
| rs73060484  | LOC105376<br>755    | C  | A  | 0.065                     | 0.115        | 0.236        | 0.235        | 0.077        | 0.134        | IND = EUR < AFR < SAS < EAS < AMR | Increased risk of COVID-19 related mortality | 144 |
| rs10490770  | LZTFL1              | C  | T  | 0.251                     | 0.004        | 0.043        | 0.005        | 0.081        | 0.296        | AFR < EAS < AMR < EUR < IND = SAS | Increased risk of COVID-19 related mortality | 140 |
| rs55986907  | RPS26P32<br>- TOMM7 | T  | C  | 0.373                     | 0.123        | 0.337        | 0.159        | 0.284        | 0.374        | AFR < EAS < EUR < AMR = IND = SAS | Increased risk of COVID-19 related mortality | 102 |
| rs113892140 | SLC39A10            | A  | G  | 0.078                     | 0.256        | 0.238        | 0.202        | 0.046        | 0.077        | EUR < SAS = IND < EAS < AMR < AFR | Increased risk of COVID-19 related mortality | 102 |
| rs2298659   | TMPRSS2             | G  | A  | 0.834                     | 0.825        | 0.782        | 0.751        | 0.77         | 0.811        | EAS < EUR < AMR < SAS = AFR = IND | Increased risk of COVID-19 related mortality | 71  |

880  
881

882  
883  
884  
885

**Table 5: Genetic variants related to comorbidities that are risk factors of COVID-19 susceptibility/severity.**

<sup>p</sup> Effect allele frequency in Indian population. <sup>q</sup> EAF (India) compared with EAF in other populations (IND – India, EUR – Europe, AMR – America, SAS – South Asia, AFR – Africa, EAS – East Asia. ‘=’ denotes no significant difference between EAF of Indian and the other population. (EA – effect allele, OA – other allele, Ref – references).

| rsid       | Gene   | EA | OA | IND <sup>p</sup><br>(EAF) | AFR<br>(EAF) | AMR<br>(EAF) | EAS<br>(EAF) | EUR<br>(EAF) | SAS<br>(EAF) | EAF comparison <sup>q</sup>       | Effect                                                                                                                                                                        | Ref      |
|------------|--------|----|----|---------------------------|--------------|--------------|--------------|--------------|--------------|-----------------------------------|-------------------------------------------------------------------------------------------------------------------------------------------------------------------------------|----------|
| rs2285666  | ACE2   | A  | G  | 0.459                     | 0.207        | 0.326        | 0.536        | 0.239        | 0.487        | AFR < EUR < AMR < IND = SAS < EAS | Increased risk of developing hypertension, which might increase the risk for COVID-19 severity                                                                                | 145      |
| rs4240157  | ACE2   | C  | T  | 0.31                      | 0.541        | 0.288        | 0.035        | 0.343        | 0.276        | EAS < SAS = AMR = IND < EUR < AFR | Increased risk of developing hypertension and Type 2 diabetes, which might increase the risk for COVID-19 severity                                                            | 50, 49   |
| rs4646188  | ACE2   | A  | G  | 0.938                     | 0.997        | 0.968        | 1            | 0.864        | 0.939        | EUR < IND = SAS = AMR < AFR < EAS | Increased risk of developing hypertension, which might alter COVID-19 severity Increased risk of developing atrial fibrillation and cardioembolic stroke in diabetic patients | 50, 146  |
| rs2158083  | ACE2   | C  | T  | 0.24                      | 0.172        | 0.245        | 0.005        | 0.336        | 0.188        | EAS < AFR < SAS < IND = AMR < EUR | Associated with changes in blood pressure, potentially affecting COVID-19 susceptibility and severity                                                                         | 50       |
| rs1978124  | ACE2   | T  | C  | 0.276                     | 0.098        | 0.29         | 0.005        | 0.456        | 0.208        | EAS < AFR < SAS < IND = AMR < EUR | Increased risk of developing hypertension, which might increase the risk for COVID-19 severity                                                                                | 50, 130  |
| rs2074192  | ACE2   | T  | C  | 0.222                     | 0.351        | 0.405        | 0.43         | 0.432        | 0.227        | IND < SAS < AFR < AMR < EAS < EUR | Increased risk of developing hypertension, potentially affecting COVID-19 susceptibility and severity                                                                         | 49       |
| rs4646155  | ACE2   | T  | C  | 0.069                     | 0.136        | 0.019        | 0.032        | 0.002        | 0.085        | EUR < AMR < EAS < IND = SAS < AFR | Increased risk of developing essential hypertension, thereby modulating COVID-19 susceptibility and severity,                                                                 | 147      |
| rs2106809  | ACE2   | T  | C  | 0.545                     | 0.913        | 0.687        | 0.477        | 0.751        | 0.509        | EAS < SAS = IND < AMR < EUR < AFR | Increased risk of developing essential hypertension, thereby modulating COVID-19 susceptibility and severity,                                                                 | 148      |
| rs55790676 | ADAM17 | T  | G  | 0.075                     | 0.081        | 0.134        | 0.02         | 0.184        | 0.096        | EAS < IND = AFR = SAS < AMR < EUR | Decreased total cholesterol levels and increased HDL levels, potentially affecting COVID-19 severity                                                                          | 50       |
| rs2107538  | CCL5   | T  | C  | 0.281                     | 0.451        | 0.225        | 0.322        | 0.161        | 0.309        | EUR < AMR < IND = SAS = EAS < AFR | Associated with type 2 diabetes and tuberculosis, which might affect COVID-19 susceptibility and severity                                                                     | 149, 150 |
| rs1800796  | IL6    | C  | G  | 0.348                     | 0.103        | 0.295        | 0.791        | 0.048        | 0.395        | EUR < AFR < AMR = IND = SAS < EAS | Increased risk of coronary artery disease, which might affect COVID-19 severity                                                                                               | 151      |
| rs3745264  | RAVER1 | A  | C  | 0.201                     | 0.057        | 0.297        | 0.178        | 0.157        | 0.213        | AFR < EUR < EAS = IND = SAS < AMR | Increased risk of developing familial hypercholesterolemia                                                                                                                    | 152, 42  |

886
